# Supplementary material
Source: PubMed Central journal article supplement (PMC2638707)
Supplement: msn108_1.pdf [file msn108_1.pdf]

## Supporting Material

### The deep archaeal roots of eukaryotes

Natalya Yutin, Kira S. Makarova, Sergey L. Mekhedov, Yuri I. Wolf, Eugene V. Koonin\*

## Supplemental Methods

### Identification of the core of a protein cluster

Proteins within a cluster of apparent orthologs often exhibit substantial diversity of domain architectures, especially, in eukaryotes. We designed a procedure to extract the maximum region of shared sequence similarity and construct a "core" alignment representing the cluster. This procedure was applied to all eukaryotic, archaeal and bacterial clusters of putative orthologs analyzed in this work.

***Step 1: approximate consensus PSSM.*** The median length of the sequences comprising a cluster was calculated; sequences shorter than  $\times 0.5$  or longer than  $\times 10$  of the median were discarded. The remaining sequences were clustered using the NCBI BLASTCLUST program; BLASTCLUST parameters were iteratively adjusted within the preset limits (from "-S 90 -L 0.85" to "-S 0.3 -L 0.5") aiming to obtain 25 subclusters. Sequences with the lengths closest to the median length of their respective subclusters were selected to represent the subcluster.

The selected representatives were aligned using the MUSCLE program (Edgar 2004). Each alignment column was assigned a homogeneity value by scaling the sum-of-pairs score within the column between those of a homogeneous column (the same residue in all aligned sequences) and a random column (YIW, I. A. Seledtsov IA, KSM, unpublished). Columns with homogeneity of less than

0.2 and/or with more than one-third of gap characters were removed from the alignment. A consensus sequence was created from the alignment. The alignment and its consensus were used as the source of the PSI-BLAST PSSM and the query sequence, respectively (Altschul et al. 1997).

***Step 2: mapping the approximate consensus to the original sequences.*** The alignment and its consensus, obtained at Step 1, were used in a PSI-BLAST search against the database consisting of the original cluster members. Proteins that did not show significant similarity to the query ( $e$ -value  $>0.01$ ) were removed. If the unaligned N- and C-terminal fragments of the consensus were shorter than 1/3 of the consensus sequence length, the protein sequence was padded with an appropriate number of residues to match the full length of the consensus sequence. Median length of the protein fragments that showed significant similarity to the core PSSM was computed, and sequences shorter than 1/3 of the median were removed.

### **Interdomain BLAST searches**

For each cluster, core protein sequences were aligned using the MUSCLE program (Edgar 2004). As an additional refining step, all sequences were compared to the alignment consensus in positions with the alignment column homogeneity  $>0.4$ . Sequences with similarity to the consensus less than  $\times 0.3$  of the similarity of consensus to itself were removed from the alignment. After this procedure, columns with homogeneity  $<0.2$  and/or with more than one-third of gap characters were removed. A new consensus sequence was created and added back to the refined alignment.

The alignment with its consensus as the query were used for single-pass PSI-BLAST search (Altschul et al. 1997): eukaryotic PSSMs were run against archaeal or bacterial databases, and the respective reciprocal searches were performed. For each cluster in the target database the score against the query cluster was determined as the average score of the cluster members. Target clusters were ranked according to these scores. Reciprocal best hits between eukaryotic and archaeal and eukaryotic and bacterial clusters were recorded.

## Phylogenetic analysis

***First-round phylogenetic analysis.*** Initial phylogenetic analysis and the choice of the best (for each alignment) amino-acid substitution matrix were performed using the PhyML software (Guindon and Gascuel 2003). Each alignment was run with 8 substitution models offered by PhyML for amino-acid sequences: JTT (Jones, Taylor, and Thornton 1992), Dayhoff (Dayhoff, Schwartz, and Orcutt 1978), WAG (Whelan and Goldman 2001), DCMut (Kosiol and Goldman 2005), RtREV (Dimmic et al. 2002), CpREV (Adachi et al. 2000) VT (Muller and Vingron 2000), and Blosum62 (Henikoff and Henikoff 1992). Two mitochondrial models (mtREV and MtMam) also available in PhyML were not used. For each of 8 substitution models, a Maximum Likelihood tree was constructed using with following parameters: number of relative substitution rate categories was 4; the proportion of invariable sites and alpha (gamma distribution parameter) were adjustable (estimated). The best tree was chosen by maximum log-likelihood of eight trees. The substitution model used for the best tree was chosen for the next round of phylogenetic analysis.

***Selection of representatives for the second-round Maximum Likelihood phylogenetic analysis.*** Maximum-Likelihood (ML) phylogenetic analysis is a very computationally-intensive procedure with resource usage critically dependent on the number of sequences. Thus, reduction of the number of sequences is desirable. Moreover, with the horizontal gene transfer rampant in the prokaryotic world and, possibly, in unicellular eukaryotes as well (Doolittle 1999), not all sequences are equally suited to represent their taxonomic group (obviously, a gene in a bacterial genome that has recently been acquired from archaea cannot be a proper representative of the respective bacterial branch). Ideally, it is desirable to select a "maximally diverse" subset of "typical" sequences, representing the "native phylogenetic position" of a given clade. Operationally, we aim to approximate these goals using the following procedure.

A PhyML-tree was midpoint-rooted using the RETREE program from the PHYLIP package (Felsenstein 1996). Each terminal node (leaf) of the rooted tree was labeled with one of the four taxonomic labels: Crenarchaeota, Euryarchaeota, Eukaryota, or Bacteria (hereinafter CA, EA, E and B; *Nanoarchaeon equitans* was artificially placed within Euryarchaeota for the purpose of this analysis).

Each leaf was given a weight equal to the square root of the number of individual genomes in the subcluster (as the leaves in the PhyML tree are, generally, representatives of similarity-based subclusters). In a leaves-to-root pass over the tree, each internal node was assigned 4 weights (for CA, EA, E and B) which represented the sum of the corresponding weights of the descendant nodes. Each of these weights was then normalized by the taxon-specific sum across the tree. Note that by design of this procedure the root node acquires the weight of 1.0 for each of the four taxa. Each internal node was then formally labeled with a taxon that had the maximum taxon-specific weight.

For each node of the tree, two indices, "representativeness" ( $R$ ) and "purity" ( $P$ ), were computed for the titular taxon.  $R$  is simply the taxon-specific weight, i.e., the fraction of all taxon members that descend from this node.  $P$  reflects the number of representatives of other taxa descend from this node and is computed as one minus the average weight of other taxa at this node. Obviously, at the leaves  $P=1$  (because a terminal node is assigned to a single taxon); the same holds for all subtrees where leaves are taxonomically homogeneous. In an ideal tree for each taxon, there exists a node with  $R=1$  and  $P=1$  (i.e. all members of a taxon are monophyletic on a taxonomically homogeneous subtree). In the real trees, each node was assigned a "quality" index  $Q=RP^2$ , and for each taxon, the node with the maximum value of  $Q$  that is not a parent of a selected node for another taxon with a higher  $Q$  index was identified. The 4 selected nodes (one for each of CA, EA, E and B) represented the "largest nearly homogeneous" clades for the respective taxa and served as the sources of the representatives.

For the purpose of selection of representatives, the four representative nodes were treated as roots of the corresponding independent (sub)trees. Leaves from the non-titular taxa were removed and root-to-leaf as well as leaf-to-leaf distances were computed for the remaining leaves. Optimal root-to-leaf distance was set to that of the 33rd percentile of all root-to-leaf distances (i.e., favoring relatively slowly evolving genes but not the most slowly evolving ones). Each terminal node was "rewarded" for the minimum deviation of its root-to-leaf distance from the optimum value (computed as the ratio of the smaller of the two values to the larger one) and for the distance to the earlier selected representatives (the shortest distance was used). The leaf with the largest product

of the two rewards was added to the pool of selected representatives; leaf-to-leaf distance rewards were recomputed (as the selected set changed) and the process was repeated until the required number of representatives was taken or the pool of candidates was exhausted.

***Second-round Maximum Likelihood trees.*** Representative sequences were re-aligned using the MUSCLE program (Edgar 2004). Maximum Likelihood trees were constructed using the TreeFinder program (Jobb, von Haeseler, and Strimmer 2004), with the evolutionary model chosen by PhyMLtree log-likelihood comparisons with estimated site rate heterogeneity. Tree topologies were compared using the TreeFinder program according to either their expected likelihood weights (Strimmer and Rambaut 2002) or by the Approximately Unbiased test (AU)  $p$ -value (Shimodaira 2002).

## References

- Adachi, J., P. J. Waddell, W. Martin, and M. Hasegawa. 2000. Plastid genome phylogeny and a model of amino acid substitution for proteins encoded by chloroplast DNA. *J Mol Evol* **50**:348-358.
- Altschul, S. F., T. L. Madden, A. A. Schaffer, J. Zhang, Z. Zhang, W. Miller, and D. J. Lipman. 1997. Gapped BLAST and PSI-BLAST: a new generation of protein database search programs. *Nucleic Acids Res* **25**:3389-3402.
- Dayhoff, M. O., R. M. Schwartz, and B. C. Orcutt. 1978. A model of evolutionary change in proteins *in* M. O. Dayhoff, ed. *Atlas of Protein Sequence and Structure Nat. Biomed. Res. Foundation, Washington, DC.*
- Dimmic, M. W., J. S. Rest, D. P. Mindell, and R. A. Goldstein. 2002. rtREV: an amino acid substitution matrix for inference of retrovirus and reverse transcriptase phylogeny. *J Mol Evol* **55**:65-73.
- Doolittle, W. F. 1999. Lateral genomics. *Trends Cell Biol* **9**:M5-8.
- Edgar, R. C. 2004. MUSCLE: multiple sequence alignment with high accuracy and high throughput. *Nucleic Acids Res* **32**:1792-1797.
- Felsenstein, J. 1996. Inferring phylogenies from protein sequences by parsimony, distance, and likelihood methods. *Methods Enzymol* **266**:418-427.
- Guindon, S., and O. Gascuel. 2003. A simple, fast, and accurate algorithm to estimate large phylogenies by maximum likelihood. *Syst Biol* **52**:696-704.
- Henikoff, S., and J. G. Henikoff. 1992. Amino acid substitution matrices from protein blocks. *Proc Natl Acad Sci U S A* **89**:10915-10919.
- Jobb, G., A. von Haeseler, and K. Strimmer. 2004. TREEFINDER: a powerful graphical analysis environment for molecular phylogenetics. *BMC Evol Biol* **4**:18.
- Jones, D. T., W. R. Taylor, and J. M. Thornton. 1992. The rapid generation of mutation data matrices from protein sequences. *Comput Appl Biosci* **8**:275-282.
- Kosiol, C., and N. Goldman. 2005. Different versions of the Dayhoff rate matrix. *Mol Biol Evol* **22**:193-199.
- Muller, T., and M. Vingron. 2000. Modeling amino acid replacement. *J Comput Biol* **7**:761-776.
- Shimodaira, H. 2002. An approximately unbiased test of phylogenetic tree selection. *Syst Biol* **51**:492-508.
- Strimmer, K., and A. Rambaut. 2002. Inferring confidence sets of possibly misspecified gene trees. *Proc Biol Sci* **269**:137-142.
- Whelan, S., and N. Goldman. 2001. A general empirical model of protein evolution derived from multiple protein families using a maximum-likelihood approach. *Mol Biol Evol* **18**:691-699.

## Supplemental references

**Table S1.** The statistics of tested topologies for 136 trees.

| Family                               |                                                                                    | Log-Likelihood <sup>a</sup> |        |        | AU <sup>b</sup> |       |       | ELW <sup>c</sup> |       |       | S <sup>d</sup> |
|--------------------------------------|------------------------------------------------------------------------------------|-----------------------------|--------|--------|-----------------|-------|-------|------------------|-------|-------|----------------|
|                                      |                                                                                    | C                           | CA     | EA     | C               | CA    | EA    | C                | CA    | EA    |                |
| arCOG00018-<br>KOD03974-<br>COG00063 | G; Predicted sugar kinase                                                          | -12572                      | -12582 | -12582 | 0.790           | 0.212 | 0.301 | 0.770            | 0.086 | 0.144 |                |
| arCOG00027-<br>KOD01383-<br>COG00076 | E; Glutamate decarboxylase and related<br>PLP-dependent proteins                   | -15951                      | -15956 | -15955 | 0.686           | 0.304 | 0.446 | 0.622            | 0.133 | 0.245 |                |
| arCOG00029-<br>KOD01377-<br>COG00461 | F; Orotate phosphoribosyltransferase                                               | -7557                       | -7562  | -7567  | 0.791           | 0.351 | 0.193 | 0.676            | 0.216 | 0.108 |                |
| arCOG00042-<br>KOD02840-<br>COG00037 | D; Predicted ATPase of the PP-loop<br>superfamily implicated in cell cycle control | -11939                      | -11942 | -11939 | 0.657           | 0.371 | 0.534 | 0.376            | 0.297 | 0.328 |                |
| arCOG00063-<br>KOD02387-<br>COG00504 | F; CTP synthase (UTP-ammonia lyase)                                                | -21281                      | -21296 | -21270 | 0.276           | 0.000 | 0.729 | 0.272            | 0.001 | 0.727 |                |
| arCOG00086-<br>KOD00026-<br>COG00512 | E; Anthranilate/para-aminobenzoate<br>synthases component II                       | -7505                       | -7506  | -7506  | 0.744           | 0.292 | 0.387 | 0.532            | 0.197 | 0.271 |                |
| arCOG00090-<br>KOD03179-<br>COG00518 | F; GMP synthase - Glutamine<br>amidotransferase domain                             | -7330                       | -7340  | -7340  | 0.853           | 0.219 | 0.200 | 0.835            | 0.083 | 0.082 |                |
| arCOG00109-<br>KOD03191-<br>COG02890 | J; Methylase of polypeptide chain release<br>factors                               | -8797                       | -8799  | -8795  | 0.444           | 0.311 | 0.729 | 0.264            | 0.216 | 0.520 |                |
| arCOG00110-<br>KOD02904-<br>COG02813 | J; 16S RNA G1207 methylase RsmC                                                    | -7773                       | -7775  | -7774  | 0.670           | 0.354 | 0.472 | 0.443            | 0.185 | 0.372 |                |
| arCOG00245-<br>KOD02380-<br>COG00287 | E; Prephenate dehydrogenase                                                        | -11111                      | -11110 | -11112 | 0.526           | 0.609 | 0.402 | 0.272            | 0.522 | 0.206 |                |
| arCOG00312-<br>KOD00854-<br>COG00450 | O; Peroxiredoxin                                                                   | -7593                       | -7593  | -7593  | 0.644           | 0.489 | 0.262 | 0.457            | 0.333 | 0.209 |                |

|                                      |                                                                                     |        |        |        |       |       |       |       |       |       |    |
|--------------------------------------|-------------------------------------------------------------------------------------|--------|--------|--------|-------|-------|-------|-------|-------|-------|----|
| arCOG00324-<br>KOD01343-<br>COG00123 | B; Deacetylases including yeast histone deacetylase and acetoin utilization protein | -13049 | -13049 | -13048 | 0.267 | 0.281 | 0.807 | 0.190 | 0.191 | 0.619 |    |
| arCOG00350-<br>KOD02423-<br>COG01161 | R; Predicted GTPases                                                                | -10552 | -10549 | -10548 | 0.351 | 0.472 | 0.708 | 0.291 | 0.257 | 0.452 |    |
| arCOG00402-<br>KOD04163-<br>COG00442 | J; Prolyl-tRNA synthetase                                                           | -20255 | -20266 | -20265 | 0.773 | 0.325 | 0.322 | 0.659 | 0.180 | 0.161 | A  |
| arCOG00403-<br>KOD02509-<br>COG00172 | J; Seryl-tRNA synthetase                                                            | -15937 | -15930 | -15935 | 0.218 | 0.849 | 0.116 | 0.211 | 0.728 | 0.061 |    |
| arCOG00405-<br>KOD02298-<br>COG00423 | J; Glycyl-tRNA synthetase (class II)                                                | -22370 | -22364 | -22366 | 0.330 | 0.614 | 0.509 | 0.115 | 0.434 | 0.452 |    |
| arCOG00406-<br>KOD00556-<br>COG00017 | J; Aspartyl/asparaginyl-tRNA synthetases                                            | -19133 | -19141 | -19142 | 0.783 | 0.282 | 0.095 | 0.711 | 0.252 | 0.037 |    |
| arCOG00410-<br>KOD02784-<br>COG00016 | J; Phenylalanyl-tRNA synthetase alpha subunit                                       | -18167 | -18165 | -18165 | 0.120 | 0.509 | 0.578 | 0.098 | 0.426 | 0.476 |    |
| arCOG00412-<br>KOD02472-<br>COG00072 | J; Phenylalanyl-tRNA synthetase beta subunit                                        | -26797 | -26802 | -26800 | 0.603 | 0.174 | 0.490 | 0.579 | 0.071 | 0.349 |    |
| arCOG00415-<br>KOD01434-<br>COG00468 | L; RecA/RadA recombinase                                                            | -9651  | -9645  | -9644  | 0.241 | 0.255 | 0.874 | 0.228 | 0.254 | 0.518 | EA |
| arCOG00469-<br>KOD00991-<br>COG00470 | L; ATPase involved in DNA replication                                               | -12123 | -12123 | -12122 | 0.499 | 0.530 | 0.555 | 0.387 | 0.219 | 0.394 |    |
| arCOG00474-<br>KOD04410-<br>COG00212 | H; 5-formyltetrahydrofolate cyclo-ligase                                            | -8445  | -8446  | -8446  | 0.637 | 0.391 | 0.509 | 0.353 | 0.207 | 0.440 |    |
| arCOG00476-<br>KOD07663-<br>COG00382 | H; 4-hydroxybenzoate polyprenyltransferase and related prenyltransferases           | -13049 | -13059 | -13058 | 0.940 | 0.000 | 0.067 | 0.917 | 0.012 | 0.071 |    |
| arCOG00487-<br>KOD04426-<br>COG00018 | J; Arginyl-tRNA synthetase                                                          | -26893 | -26896 | -26904 | 0.557 | 0.468 | 0.029 | 0.553 | 0.435 | 0.012 |    |
| arCOG00488-<br>KOD01636-             | L; DNA polymerase sliding clamp subunit (PCNA homolog)                              | -12905 | -12910 | -12913 | 0.705 | 0.371 | 0.169 | 0.662 | 0.290 | 0.048 |    |



|                                      |                                                                                                  |        |        |        |       |       |       |       |       |       |
|--------------------------------------|--------------------------------------------------------------------------------------------------|--------|--------|--------|-------|-------|-------|-------|-------|-------|
| COG00592                             |                                                                                                  |        |        |        |       |       |       |       |       |       |
| arCOG00494-<br>KOD04777-<br>COG00136 | E; Aspartate-semialdehyde dehydrogenase                                                          | -13687 | -13686 | -13687 | 0.449 | 0.661 | 0.437 | 0.241 | 0.433 | 0.327 |
| arCOG00618-<br>KOD03055-<br>COG00106 | E; Phosphoribosylformimino-5-<br>aminoimidazole carboxamide<br>ribonucleotide (ProFAR) isomerase | -9977  | -9977  | -9974  | 0.306 | 0.392 | 0.727 | 0.135 | 0.311 | 0.554 |
| arCOG00770-<br>KOD01132-<br>COG01199 | K; Rad3-related DNA helicases                                                                    | -11450 | -11452 | -11450 | 0.626 | 0.342 | 0.517 | 0.382 | 0.154 | 0.464 |
| arCOG00779-<br>KOD01742-<br>COG00200 | J; Ribosomal protein L15                                                                         | -6115  | -6125  | -6123  | 0.824 | 0.115 | 0.258 | 0.783 | 0.055 | 0.161 |
| arCOG00807-<br>KOD00434-<br>COG00060 | J; Isoleucyl-tRNA synthetase                                                                     | -40464 | -40458 | -40480 | 0.316 | 0.684 | 0.000 | 0.325 | 0.675 | 0.000 |
| arCOG00809-<br>KOD00437-<br>COG00495 | J; Leucyl-tRNA synthetase                                                                        | -38538 | -38546 | -38544 | 0.756 | 0.355 | 0.383 | 0.476 | 0.256 | 0.268 |
| arCOG00810-<br>KOD01247-<br>COG00143 | J; Methionyl-tRNA synthetase                                                                     | -23962 | -23933 | -23971 | 0.013 | 0.994 | 0.000 | 0.014 | 0.974 | 0.013 |
| arCOG00833-<br>KOD03235-<br>COG00456 | R; Acetyltransferases                                                                            | -5439  | -5438  | -5439  | 0.274 | 0.669 | 0.462 | 0.207 | 0.505 | 0.288 |
| arCOG00874-<br>KOD01123-<br>COG01061 | K; DNA or RNA helicases of superfamily II                                                        | -17543 | -17545 | -17544 | 0.598 | 0.477 | 0.497 | 0.362 | 0.233 | 0.405 |
| arCOG00914-<br>KOD01402-<br>COG04992 | E; Ornithine/acetylornithine<br>aminotransferase                                                 | -15789 | -15794 | -15792 | 0.671 | 0.418 | 0.459 | 0.436 | 0.276 | 0.288 |
| arCOG00973-<br>KOD01122-<br>COG00144 | J; tRNA and rRNA cytosine-C5-methylases                                                          | -9298  | -9298  | -9284  | 0.077 | 0.079 | 0.947 | 0.048 | 0.025 | 0.928 |
| arCOG00976-<br>KOD01661-<br>COG02518 | O; Protein-L-isoaspartate<br>carboxylmethyltransferase                                           | -7840  | -7837  | -7838  | 0.194 | 0.832 | 0.342 | 0.178 | 0.546 | 0.276 |
| arCOG00987-<br>KOD02529-<br>COG00130 | J; Pseudouridine synthase                                                                        | -7490  | -7491  | -7484  | 0.139 | 0.051 | 0.902 | 0.128 | 0.042 | 0.830 |

|                                      |                                                                                   |        |        |        |       |       |       |       |       |       |
|--------------------------------------|-----------------------------------------------------------------------------------|--------|--------|--------|-------|-------|-------|-------|-------|-------|
| arCOG01001-<br>KOD02775-<br>COG00024 | J; Methionine aminopeptidase                                                      | -11938 | -11938 | -11939 | 0.534 | 0.618 | 0.345 | 0.363 | 0.431 | 0.206 |
| arCOG01122-<br>KOD03075-<br>COG00120 | G; Ribose 5-phosphate isomerase                                                   | -9185  | -9183  | -9185  | 0.400 | 0.654 | 0.478 | 0.223 | 0.522 | 0.255 |
| arCOG01136-<br>KOD02241-<br>COG00073 | R; EMAP domain                                                                    | -4701  | -4707  | -4707  | 0.786 | 0.288 | 0.299 | 0.750 | 0.125 | 0.125 |
| arCOG01141-<br>KOD03325-<br>COG00622 | R; Predicted phosphoesterase                                                      | -6959  | -6956  | -6955  | 0.314 | 0.567 | 0.618 | 0.194 | 0.365 | 0.441 |
| arCOG01143-<br>KOD00372-<br>COG00639 | T; Diadenosine tetraphosphatase and related serine/threonine protein phosphatases | -8321  | -8320  | -8322  | 0.558 | 0.582 | 0.357 | 0.335 | 0.499 | 0.166 |
| arCOG01163-<br>KOD00785-<br>COG00473 | C; Isocitrate/isopropylmalate dehydrogenase                                       | -14990 | -14976 | -14992 | 0.082 | 0.931 | 0.116 | 0.040 | 0.863 | 0.097 |
| arCOG01169-<br>KOD02670-<br>COG00148 | G; Enolase                                                                        | -15059 | -15065 | -15075 | 0.685 | 0.341 | 0.029 | 0.669 | 0.321 | 0.010 |
| arCOG01179-<br>KOD03403-<br>COG00361 | J; Translation initiation factor 1 (IF-1)                                         | -2806  | -2808  | -2806  | 0.548 | 0.147 | 0.547 | 0.432 | 0.089 | 0.479 |
| arCOG01183-<br>KOD02708-<br>COG00533 | O; Metal-dependent proteases with possible chaperone activity                     | -10700 | -10699 | -10701 | 0.505 | 0.652 | 0.407 | 0.268 | 0.407 | 0.325 |
| arCOG01225-<br>KOD01532-<br>COG01100 | R; GTPase SAR1 and related small G proteins                                       | -10445 | -10448 | -10448 | 0.889 | 0.172 | 0.161 | 0.753 | 0.123 | 0.124 |
| arCOG01227-<br>KOD00781-<br>COG00552 | U; Signal recognition particle GTPase                                             | -13092 | -13090 | -13090 | 0.088 | 0.497 | 0.566 | 0.061 | 0.458 | 0.481 |
| arCOG01228-<br>KOD00780-<br>COG00541 | U; Signal recognition particle GTPase                                             | -19259 | -19262 | -19261 | 0.754 | 0.349 | 0.375 | 0.489 | 0.310 | 0.201 |
| arCOG01257-<br>KOD00357-<br>COG00459 | O; Chaperonin GroEL (HSP60 family)                                                | -20007 | -20009 | -20009 | 0.802 | 0.289 | 0.184 | 0.662 | 0.213 | 0.125 |
| arCOG01292-<br>KOD01800-             | E; NADPH-dependent glutamate synthase beta chain and related oxidoreductases      | -14745 | -14750 | -14750 | 0.874 | 0.205 | 0.159 | 0.748 | 0.160 | 0.092 |

|                                      |                                                                 |        |        |        |       |       |       |       |       |       |
|--------------------------------------|-----------------------------------------------------------------|--------|--------|--------|-------|-------|-------|-------|-------|-------|
| COG00493                             |                                                                 |        |        |        |       |       |       |       |       |       |
| arCOG01307-<br>KOD00739-<br>COG00464 | O; ATPases of the AAA+ class                                    | -12427 | -12427 | -12428 | 0.560 | 0.536 | 0.185 | 0.441 | 0.414 | 0.145 |
| arCOG01351-<br>KOD00455-<br>COG00460 | E; Homoserine dehydrogenase                                     | -13530 | -13516 | -13526 | 0.160 | 0.891 | 0.066 | 0.157 | 0.805 | 0.038 |
| arCOG01352-<br>KOD02250-<br>COG00334 | E; Glutamate dehydrogenase/leucine dehydrogenase                | -16014 | -16024 | -16024 | 0.981 | 0.033 | 0.036 | 0.947 | 0.028 | 0.024 |
| arCOG01358-<br>KOD04355-<br>COG00621 | J; 2-methylthioadenine synthetase                               | -20219 | -20219 | -20216 | 0.395 | 0.344 | 0.727 | 0.334 | 0.171 | 0.496 |
| arCOG01371-<br>KOD00747-<br>COG01088 | M; dTDP-D-glucose 4 6-dehydratase                               | -11623 | -11621 | -11624 | 0.512 | 0.593 | 0.466 | 0.227 | 0.460 | 0.313 |
| arCOG01482-<br>KOD03008-<br>COG00157 | H; Nicotinate-nucleotide pyrophosphorylase                      | -10997 | -11013 | -11013 | 0.914 | 0.111 | 0.140 | 0.898 | 0.048 | 0.054 |
| arCOG01527-<br>KOD01957-<br>COG00550 | L; Topoisomerase IA                                             | -28055 | -28060 | -28058 | 0.665 | 0.243 | 0.448 | 0.522 | 0.087 | 0.391 |
| arCOG01529-<br>KOD01175-<br>COG00365 | I; Acyl-coenzyme A synthetases/AMP- (fatty) acid ligases        | -26159 | -26151 | -26168 | 0.229 | 0.867 | 0.096 | 0.185 | 0.753 | 0.062 |
| arCOG01532-<br>KOD01602-<br>COG00020 | I; Undecaprenyl pyrophosphate synthase                          | -10667 | -10663 | -10661 | 0.365 | 0.483 | 0.686 | 0.268 | 0.272 | 0.460 |
| arCOG01559-<br>KOD00469-<br>COG00480 | J; Translation elongation factors (GTPases)                     | -30537 | -30538 | -30539 | 0.636 | 0.478 | 0.207 | 0.445 | 0.452 | 0.103 |
| arCOG01560-<br>KOD01144-<br>COG00532 | J; Translation initiation factor 2 (IF-2; GTPase)               | -21751 | -21743 | -21751 | 0.415 | 0.674 | 0.415 | 0.234 | 0.603 | 0.163 |
| arCOG01575-<br>KOD01068-<br>COG00689 | J; RNase PH                                                     | -9020  | -9031  | -9032  | 0.865 | 0.201 | 0.204 | 0.794 | 0.080 | 0.126 |
| arCOG01594-<br>KOD00370-<br>COG00458 | E; Carbamoylphosphate synthase large subunit (split gene in MJ) | -38565 | -38374 | -38564 | 0.000 | 0.235 | 0.000 | 0.000 | 1.000 | 0.000 |

|                                      |                                                                                                                      |        |        |        |       |       |       |       |       |       |   |
|--------------------------------------|----------------------------------------------------------------------------------------------------------------------|--------|--------|--------|-------|-------|-------|-------|-------|-------|---|
| arCOG01695-<br>KOD02030-<br>COG01293 | K; Predicted RNA-binding protein homologous to eukaryotic snRNP                                                      | -28872 | -28869 | -28875 | 0.284 | 0.817 | 0.279 | 0.152 | 0.615 | 0.233 |   |
| arCOG01704-<br>KOD00672-<br>COG00452 | H; Phosphopantothenoylcysteine synthetase/decarboxylase                                                              | -13586 | -13612 | -13612 | 0.990 | 0.018 | 0.016 | 0.978 | 0.008 | 0.014 |   |
| arCOG01706-<br>KOD00558-<br>COG00508 | C; Pyruvate/2-oxoglutarate dehydrogenase complex dihydrolipoamide acyltransferase (E2) component and related enzymes | -14333 | -14331 | -14334 | 0.437 | 0.667 | 0.180 | 0.319 | 0.583 | 0.098 |   |
| arCOG01722-<br>KOD03311-<br>COG00099 | J; Ribosomal protein S13                                                                                             | -5409  | -5409  | -5406  | 0.213 | 0.208 | 0.861 | 0.161 | 0.161 | 0.678 |   |
| arCOG01739-<br>KOD03342-<br>COG00681 | U; Signal peptidase I                                                                                                | -5763  | -5764  | -5764  | 0.747 | 0.396 | 0.283 | 0.520 | 0.253 | 0.227 |   |
| arCOG01751-<br>KOD03387-<br>COG01358 | J; Ribosomal protein HS6-type (S12/L30/L7a)                                                                          | -4729  | -4730  | -4730  | 0.736 | 0.256 | 0.380 | 0.523 | 0.215 | 0.263 |   |
| arCOG01758-<br>KOD00900-<br>COG00051 | J; Ribosomal protein S10                                                                                             | -3755  | -3753  | -3751  | 0.360 | 0.329 | 0.766 | 0.325 | 0.185 | 0.489 |   |
| arCOG01887-<br>KOD02145-<br>COG00180 | J; Tryptophanyl-tRNA synthetase                                                                                      | -14127 | -14089 | -14127 | 0.000 | 0.805 | 0.000 | 0.000 | 1.000 | 0.000 |   |
| arCOG01891-<br>KOD03327-<br>COG00125 | F; Thymidylate kinase                                                                                                | -8255  | -8245  | -8253  | 0.066 | 0.866 | 0.172 | 0.023 | 0.821 | 0.157 |   |
| arCOG01920-<br>KOD01999-<br>COG00250 | K; Transcription antiterminator                                                                                      | -7163  | -7159  | -7161  | 0.363 | 0.600 | 0.535 | 0.154 | 0.525 | 0.321 |   |
| arCOG01924-<br>KOD00503-<br>COG00252 | E; L-asparaginase/archaeal Glu-tRNA <sup>Gln</sup> amidotransferase subunit D                                        | -14581 | -14596 | -14596 | 0.903 | 0.144 | 0.150 | 0.888 | 0.056 | 0.056 | A |
| arCOG02014-<br>KOD01223-<br>COG00147 | E; Anthranilate/para-aminobenzoate synthases component I                                                             | -16263 | -16275 | -16269 | 0.737 | 0.000 | 0.265 | 0.718 | 0.002 | 0.280 |   |
| arCOG02208-<br>KOD02831-<br>COG00040 | E; ATP phosphoribosyltransferase                                                                                     | -11049 | -11050 | -11049 | 0.563 | 0.147 | 0.521 | 0.464 | 0.119 | 0.416 |   |
| arCOG02297-<br>KOD00975-             | E; Branched-chain amino acid aminotransferase/4-amino-4-                                                             | -11545 | -11540 | -11547 | 0.242 | 0.802 | 0.091 | 0.197 | 0.767 | 0.037 |   |

|                                      |                                                                                                        |        |        |        |       |       |       |       |       |       |
|--------------------------------------|--------------------------------------------------------------------------------------------------------|--------|--------|--------|-------|-------|-------|-------|-------|-------|
| COG00115                             | deoxychorismate lyase                                                                                  |        |        |        |       |       |       |       |       |       |
| arCOG02303-<br>KOD06476-<br>COG00496 | R; Predicted acid phosphatase                                                                          | -10274 | -10274 | -10278 | 0.674 | 0.597 | 0.180 | 0.417 | 0.408 | 0.176 |
| arCOG02431-<br>KOD05042-<br>COG01611 | R; Predicted Rossmann fold nucleotide-binding protein                                                  | -7053  | -7058  | -7058  | 0.815 | 0.261 | 0.256 | 0.767 | 0.116 | 0.116 |
| arCOG02833-<br>KOD09166-<br>COG00265 | O; Trypsin-like serine proteases typically periplasmic contain C-terminal PDZ domain                   | -7497  | -7498  | -7498  | 0.691 | 0.324 | 0.389 | 0.424 | 0.273 | 0.303 |
| arCOG02969-<br>KOD01046-<br>COG00308 | E; Aminopeptidase N                                                                                    | -15523 | -15524 | -15497 | 0.042 | 0.063 | 0.961 | 0.018 | 0.056 | 0.926 |
| arCOG03199-<br>KOD02788-<br>COG00472 | M; UDP-N-acetylmuramyl pentapeptide phosphotransferase/UDP-N-acetylglucosamine-1-phosphate transferase | -14145 | -14145 | -14135 | 0.119 | 0.203 | 0.847 | 0.053 | 0.121 | 0.825 |
| arCOG04050-<br>KOD02519-<br>COG00258 | L; 5'-3' exonuclease (including N-terminal domain of PolI)                                             | -12077 | -12083 | -12078 | 0.611 | 0.151 | 0.511 | 0.514 | 0.073 | 0.413 |
| arCOG04064-<br>KOD02921-<br>COG00750 | M; Predicted membrane-associated Zn-dependent proteases 1                                              | -8068  | -8068  | -8069  | 0.611 | 0.534 | 0.288 | 0.372 | 0.487 | 0.141 |
| arCOG04067-<br>KOD02309-<br>COG00090 | J; Ribosomal protein L2                                                                                | -9148  | -9153  | -9147  | 0.592 | 0.392 | 0.584 | 0.304 | 0.284 | 0.412 |
| arCOG04070-<br>KOD00746-<br>COG00087 | J; Ribosomal protein L3                                                                                | -13471 | -13475 | -13476 | 0.696 | 0.428 | 0.246 | 0.647 | 0.236 | 0.116 |
| arCOG04071-<br>KOD01475-<br>COG00088 | J; Ribosomal protein L4                                                                                | -11194 | -11194 | -11198 | 0.572 | 0.581 | 0.246 | 0.449 | 0.437 | 0.114 |
| arCOG04072-<br>KOD01751-<br>COG00089 | J; Ribosomal protein L23                                                                               | -3474  | -3471  | -3474  | 0.304 | 0.794 | 0.280 | 0.209 | 0.652 | 0.139 |
| arCOG04086-<br>KOD03184-<br>COG01841 | J; Ribosomal protein L30/L7E                                                                           | -5159  | -5158  | -5159  | 0.349 | 0.743 | 0.339 | 0.247 | 0.506 | 0.247 |
| arCOG04087-<br>KOD00877-<br>COG00098 | J; Ribosomal protein S5                                                                                | -6732  | -6730  | -6736  | 0.432 | 0.620 | 0.105 | 0.411 | 0.557 | 0.032 |

|                                      |                                                     |        |        |        |       |       |       |       |       |       |
|--------------------------------------|-----------------------------------------------------|--------|--------|--------|-------|-------|-------|-------|-------|-------|
| arCOG04088-<br>KOD00875-<br>COG00256 | J; Ribosomal protein L18                            | -6275  | -6277  | -6275  | 0.536 | 0.397 | 0.573 | 0.474 | 0.150 | 0.376 |
| arCOG04090-<br>KOD03255-<br>COG00097 | J; Ribosomal protein L6P/L9E                        | -7957  | -7947  | -7953  | 0.175 | 0.811 | 0.316 | 0.092 | 0.726 | 0.182 |
| arCOG04091-<br>KOD01754-<br>COG00096 | J; Ribosomal protein S8                             | -5250  | -5245  | -5244  | 0.155 | 0.571 | 0.578 | 0.090 | 0.397 | 0.513 |
| arCOG04092-<br>KOD00397-<br>COG00094 | J; Ribosomal protein L5                             | -6405  | -6402  | -6404  | 0.296 | 0.583 | 0.580 | 0.156 | 0.561 | 0.282 |
| arCOG04094-<br>KOD03401-<br>COG00198 | J; Ribosomal protein L24                            | -4126  | -4126  | -4125  | 0.521 | 0.469 | 0.591 | 0.389 | 0.288 | 0.323 |
| arCOG04095-<br>KOD00901-<br>COG00093 | J; Ribosomal protein L14                            | -4138  | -4190  | -4190  | 0.636 | 0.000 | 0.000 | 1.000 | 0.000 | 0.000 |
| arCOG04096-<br>KOD01728-<br>COG00186 | J; Ribosomal protein S17                            | -4013  | -3998  | -3997  | 0.099 | 0.526 | 0.579 | 0.051 | 0.479 | 0.470 |
| arCOG04097-<br>KOD03181-<br>COG00092 | J; Ribosomal protein S3                             | -8927  | -8928  | -8928  | 0.746 | 0.341 | 0.338 | 0.533 | 0.233 | 0.233 |
| arCOG04098-<br>KOD03353-<br>COG00091 | J; Ribosomal protein L22                            | -5818  | -5818  | -5818  | 0.493 | 0.662 | 0.374 | 0.472 | 0.314 | 0.214 |
| arCOG04099-<br>KOD00898-<br>COG00185 | J; Ribosomal protein S19                            | -4566  | -4566  | -4565  | 0.191 | 0.291 | 0.816 | 0.172 | 0.194 | 0.633 |
| arCOG04113-<br>KOD00857-<br>COG00197 | J; Ribosomal protein L16/L10E                       | -5917  | -5918  | -5918  | 0.602 | 0.459 | 0.520 | 0.361 | 0.369 | 0.270 |
| arCOG04121-<br>KOD02299-<br>COG00164 | L; Ribonuclease HII                                 | -8051  | -8051  | -8053  | 0.573 | 0.490 | 0.089 | 0.493 | 0.424 | 0.083 |
| arCOG04131-<br>KOD00820-<br>COG00030 | J; Dimethyladenosine transferase (rRNA methylation) | -11072 | -11070 | -11065 | 0.243 | 0.369 | 0.761 | 0.115 | 0.222 | 0.664 |
| arCOG04133-<br>KOD04492-             | E; Chorismate synthase                              | -13667 | -13695 | -13693 | 0.977 | 0.019 | 0.035 | 0.963 | 0.008 | 0.029 |

|                                      |                                                                      |        |        |        |       |       |       |       |       |       |    |
|--------------------------------------|----------------------------------------------------------------------|--------|--------|--------|-------|-------|-------|-------|-------|-------|----|
| COG00082                             |                                                                      |        |        |        |       |       |       |       |       |       |    |
| arCOG04147-<br>KOD00876-<br>COG00605 | P; Superoxide dismutase                                              | -7235  | -7258  | -7254  | 0.947 | 0.040 | 0.092 | 0.892 | 0.026 | 0.082 |    |
| arCOG04157-<br>KOD05009-<br>COG00270 | L; Site-specific DNA methylase                                       | -10745 | -10767 | -10767 | 0.968 | 0.052 | 0.051 | 0.959 | 0.020 | 0.021 |    |
| arCOG04169-<br>KOD01373-<br>COG00201 | U; Preprotein translocase subunit SecY                               | -20163 | -20161 | -20176 | 0.419 | 0.784 | 0.207 | 0.294 | 0.528 | 0.178 | CA |
| arCOG04184-<br>KOD03222-<br>COG00127 | F; Xanthosine triphosphate pyrophosphatase                           | -8093  | -8095  | -8097  | 0.681 | 0.391 | 0.196 | 0.634 | 0.305 | 0.061 |    |
| arCOG04185-<br>KOD00400-<br>COG00184 | J; Ribosomal protein S15P/S13E                                       | -5502  | -5502  | -5502  | 0.392 | 0.564 | 0.558 | 0.295 | 0.345 | 0.360 |    |
| arCOG04223-<br>KOD01770-<br>COG00023 | J; Translation initiation factor 1 (eIF-1/SUI1) and related proteins | -3962  | -3965  | -3965  | 0.713 | 0.375 | 0.368 | 0.644 | 0.178 | 0.178 |    |
| arCOG04231-<br>KOD03338-<br>COG01324 | P; Uncharacterized protein involved in tolerance to divalent cations | -4304  | -4303  | -4302  | 0.446 | 0.510 | 0.615 | 0.279 | 0.351 | 0.370 |    |
| arCOG04239-<br>KOD03301-<br>COG00522 | J; Ribosomal protein S4 and related proteins                         | -7667  | -7667  | -7667  | 0.360 | 0.373 | 0.732 | 0.276 | 0.276 | 0.448 |    |
| arCOG04240-<br>KOD00407-<br>COG00100 | J; Ribosomal protein S11                                             | -3993  | -3992  | -3989  | 0.367 | 0.399 | 0.722 | 0.279 | 0.171 | 0.549 |    |
| arCOG04241-<br>KOD01522-<br>COG00202 | K; DNA-directed RNA polymerase alpha subunit/40 kD subunit           | -12243 | -12245 | -12245 | 0.862 | 0.208 | 0.203 | 0.713 | 0.143 | 0.143 |    |
| arCOG04242-<br>KOD03204-<br>COG00102 | J; Ribosomal protein L13                                             | -5841  | -5834  | -5834  | 0.261 | 0.645 | 0.572 | 0.193 | 0.400 | 0.407 |    |
| arCOG04243-<br>KOD01753-<br>COG00103 | J; Ribosomal protein S9                                              | -5134  | -5127  | -5127  | 0.099 | 0.340 | 0.812 | 0.089 | 0.323 | 0.589 |    |
| arCOG04245-<br>KOD00830-<br>COG00052 | J; Ribosomal protein S2                                              | -7369  | -7371  | -7371  | 0.731 | 0.382 | 0.256 | 0.540 | 0.310 | 0.149 |    |

|                                      |                                                                                         |        |        |        |       |       |       |       |       |       |   |
|--------------------------------------|-----------------------------------------------------------------------------------------|--------|--------|--------|-------|-------|-------|-------|-------|-------|---|
| arCOG04248-<br>KOD02683-<br>COG00846 | K; NAD-dependent protein deacetylases<br>SIR2 family                                    | -8015  | -8020  | -8020  | 0.915 | 0.122 | 0.133 | 0.842 | 0.075 | 0.083 |   |
| arCOG04254-<br>KOD03291-<br>COG00049 | J; Ribosomal protein S7                                                                 | -6328  | -6337  | -6335  | 0.744 | 0.163 | 0.356 | 0.726 | 0.073 | 0.201 |   |
| arCOG04255-<br>KOD01749-<br>COG00048 | J; Ribosomal protein S12                                                                | -6236  | -6244  | -6237  | 0.811 | 0.259 | 0.370 | 0.491 | 0.253 | 0.257 | A |
| arCOG04257-<br>KOD00260-<br>COG00086 | K; DNA-directed RNA polymerase beta'<br>subunit/160 kD subunit                          | -35415 | -35408 | -35410 | 0.265 | 0.622 | 0.515 | 0.106 | 0.490 | 0.404 |   |
| arCOG04277-<br>KOD03271-<br>COG00231 | J; Translation elongation factor P (EF-<br>P)/translation initiation factor 5A (eIF-5A) | -5987  | -5990  | -5994  | 0.688 | 0.490 | 0.328 | 0.543 | 0.240 | 0.217 |   |
| arCOG04288-<br>KOD00815-<br>COG00244 | J; Ribosomal protein L10                                                                | -11790 | -11792 | -11792 | 0.621 | 0.479 | 0.436 | 0.568 | 0.216 | 0.216 |   |
| arCOG04289-<br>KOD01570-<br>COG00081 | J; Ribosomal protein L1                                                                 | -9573  | -9579  | -9579  | 0.915 | 0.130 | 0.089 | 0.855 | 0.084 | 0.061 |   |
| arCOG04302-<br>KOD01147-<br>COG00008 | J; Glutamyl- and glutaminyl-tRNA<br>synthetases                                         | -20153 | -20158 | -20159 | 0.724 | 0.401 | 0.360 | 0.577 | 0.193 | 0.230 |   |
| arCOG04372-<br>KOD00886-<br>COG00080 | J; Ribosomal protein L11                                                                | -6362  | -6358  | -6360  | 0.318 | 0.793 | 0.217 | 0.299 | 0.571 | 0.130 |   |
| arCOG04398-<br>KOD03143-<br>COG00131 | E; Imidazoleglycerol-phosphate<br>dehydratase                                           | -8103  | -8101  | -8107  | 0.468 | 0.603 | 0.129 | 0.437 | 0.519 | 0.043 |   |
| arCOG04449-<br>KOD02554-<br>COG00101 | J; Pseudouridylate synthase                                                             | -9362  | -9360  | -9365  | 0.452 | 0.606 | 0.065 | 0.418 | 0.544 | 0.039 |   |
| arCOG04465-<br>KOD05645-<br>COG00059 | E; Ketol-acid reductoisomerase                                                          | -11753 | -11742 | -11754 | 0.371 | 0.736 | 0.287 | 0.238 | 0.662 | 0.100 |   |
| arCOG05412-<br>KOD00626-<br>COG02723 | G; Beta-glucosidase/6-phospho-beta-<br>glucosidase/beta-galactosidase                   | -17714 | -17964 | -17964 | 0.235 | 0.000 | 0.000 | 1.000 | 0.000 | 0.000 | A |
| 1arCOG00404<br>-KOD01936-            | J; Histidyl-tRNA synthetase                                                             | -17612 | -17597 | -17614 | 0.028 | 0.978 | 0.000 | 0.029 | 0.966 | 0.005 |   |



|              |                             |                 |                 |                 |       |       |       |       |       |       |
|--------------|-----------------------------|-----------------|-----------------|-----------------|-------|-------|-------|-------|-------|-------|
| COG00124     |                             |                 |                 |                 |       |       |       |       |       |       |
| 2arCOG00404  |                             |                 |                 |                 |       |       |       |       |       |       |
| -KOD01936-   | J; Histidyl-tRNA synthetase | -16012          | -16003          | -16013          | 0.211 | 0.861 | 0.157 | 0.131 | 0.813 | 0.056 |
| COG00124     |                             |                 |                 |                 |       |       |       |       |       |       |
| 1arCOG01886  |                             |                 |                 |                 |       |       |       |       |       |       |
| -KOD02144-   | J; Tyrosyl-tRNA synthetase  | -13963          | -13967          | -13959          | 0.368 | 0.271 | 0.780 | 0.194 | 0.176 | 0.630 |
| COG00162     |                             |                 |                 |                 |       |       |       |       |       |       |
| 2arCOG01886  |                             |                 |                 |                 |       |       |       |       |       |       |
| -KOD02144-   | J; Tyrosyl-tRNA synthetase  | -14510          | -14497          | -14510          | 0.117 | 0.925 | 0.099 | 0.055 | 0.913 | 0.033 |
| COG00162     |                             |                 |                 |                 |       |       |       |       |       |       |
| <b>Total</b> |                             | <b>-1668665</b> | <b>-1668865</b> | <b>-1669217</b> |       |       |       |       |       |       |

<sup>a</sup> - Log-likelihood, reported by TreeFinder for the three competing constrained topologies: C, "classical"; CA, "crenarchaeal" and EA, "euryarchaeal".

<sup>b</sup> - AU test *p*-values, reported by TreeFinder for the three competing constrained topologies.

<sup>c</sup> - ELW values, reported by TreeFinder for the three competing constrained topologies.

<sup>d</sup> - Synapomorphies found in the alignments.

**Table S2.** The 67 analyzed eukaryotic genomes

| Species                          | Taxon                                 | Source                 |
|----------------------------------|---------------------------------------|------------------------|
| <i>Cryptosporidium parvum</i>    | Alveolata, Apicomplexa                | GB                     |
| <i>Plasmodium berghei</i>        | Alveolata, Apicomplexa                | GB                     |
| <i>Plasmodium chabaudi</i>       | Alveolata, Apicomplexa                | GB                     |
| <i>Plasmodium falciparum</i>     | Alveolata, Apicomplexa                | GB                     |
| <i>Plasmodium yoelii yoelii</i>  | Alveolata, Apicomplexa                | GB                     |
| <i>Theileria annulata</i>        | Alveolata, Apicomplexa                | GB                     |
| <i>Theileria parva</i>           | Alveolata, Apicomplexa                | GB                     |
| <i>Tetrahymena thermophila</i>   | Alveolata, Ciliophora                 | GB                     |
| <i>Giardia lamblia</i>           | Diplomonadida group,<br>Diplomonadida | GB                     |
| <i>Entamoeba histolytica</i>     | Entamoebidae, Entamoeba               | TIGR                   |
| <i>Leishmania major</i>          | Euglenozoa, Kinetoplastida            | TIGR                   |
| <i>Trypanosoma brucei</i>        | Euglenozoa, Kinetoplastida            | GB                     |
| <i>Trypanosoma cruzi</i>         | Euglenozoa, Kinetoplastida            | GB                     |
| <i>Dictyostelium discoideum</i>  | Mycetozoa, Dictyosteliida             | GB                     |
| <i>Cyanidioschyzon merolae</i>   | Rhodophyta, Bangiophyceae             | University<br>of Tokyo |
| <i>Phaeodactylum tricornutum</i> | stramenopiles, Bacillariophyta        | JGI                    |
| <i>Thalassiosira pseudonana</i>  | stramenopiles, Bacillariophyta        | JGI                    |
| <i>Phytophthora ramorum</i>      | stramenopiles, Oomycetes              | JGI                    |
| <i>Phytophthora sojae</i>        | stramenopiles, Oomycetes              | JGI                    |
| <i>Chlamydomonas reinhardtii</i> | Viridiplantae, Chlorophyta            | JGI                    |
| <i>Ostreococcus lucimarinus</i>  | Viridiplantae, Chlorophyta            | JGI                    |
| <i>Ostreococcus tauri</i>        | Viridiplantae, Chlorophyta            | EMBL                   |
| <i>Arabidopsis thaliana</i>      | Viridiplantae, Streptophyta           | GB                     |
| <i>Oryza sativa (japonica)</i>   | Viridiplantae, Streptophyta           | GB                     |
| <i>Populus trichocarpa</i>       | Viridiplantae, Streptophyta           | JGI                    |
| <i>Aspergillus fumigatus</i>     | Fungi, Ascomycota                     | GB                     |
| <i>Aspergillus oryzae</i>        | Fungi, Ascomycota                     | GB                     |
| <i>Candida albicans</i>          | Fungi, Ascomycota                     | GB                     |
| <i>Candida glabrata</i>          | Fungi, Ascomycota                     | GB                     |
| <i>Debaryomyces hansenii</i>     | Fungi, Ascomycota                     | GB                     |
| <i>Aspergillus nidulans</i>      | Fungi, Ascomycota                     | GB                     |
| <i>Eremothecium gossypii</i>     | Fungi, Ascomycota                     | GB                     |
| <i>Gibberella zeae</i>           | Fungi, Ascomycota                     | GB                     |
| <i>Trichoderma reesei</i>        | Fungi, Ascomycota                     | JGI                    |
| <i>Kluyveromyces lactis</i>      | Fungi, Ascomycota                     | GB                     |
| <i>Kluyveromyces waltii</i>      | Fungi, Ascomycota                     | MIT                    |

---

|                                      |                                 |         |
|--------------------------------------|---------------------------------|---------|
| <i>Magnaporthe grisea</i>            | Fungi, Ascomycota               | GB      |
| <i>Neurospora crassa</i>             | Fungi, Ascomycota               | GB      |
| <i>Saccharomyces cerevisiae</i>      | Fungi, Ascomycota               | GB      |
| <i>Schizosaccharomyces pombe</i>     | Fungi, Ascomycota               | GB      |
| <i>Yarrowia lipolytica</i>           | Fungi, Ascomycota               | GB      |
| <i>Cryptococcus neoformans</i>       | Fungi, Basidiomycota            | GB      |
| <i>Laccaria bicolor</i>              | Fungi, Basidiomycota            | JGI     |
| <i>Phanerochaete chrysosporium</i>   | Fungi, Basidiomycota            | JGI     |
| <i>Ustilago maydis</i>               | Fungi, Basidiomycota            | GB      |
| <i>Encephalitozoon cuniculi</i>      | Fungi, Microsporidia            | GB      |
| <i>Anopheles gambiae</i>             | Metazoa, Arthropoda             | GB      |
| <i>Apis mellifera</i>                | Metazoa, Arthropoda             | EMBL    |
| <i>Drosophila melanogaster</i>       | Metazoa, Arthropoda             | GB      |
| <i>Bos taurus</i>                    | Metazoa, Chordata               | Ensembl |
| <i>Canis lupus familiaris</i>        | Metazoa, Chordata               | GB      |
| <i>Ciona intestinalis</i>            | Metazoa, Chordata               | JGI     |
| <i>Danio rerio</i>                   | Metazoa, Chordata               | GB      |
| <i>Gallus gallus</i>                 | Metazoa, Chordata               | EMBL    |
| <i>Monodelphis domestica</i>         | Metazoa, Chordata               | Ensembl |
| <i>Homo sapiens</i>                  | Metazoa, Chordata               | GB      |
| <i>Macaca mulatta</i>                | Metazoa, Chordata               | Ensembl |
| <i>Mus musculus</i>                  | Metazoa, Chordata               | GB      |
| <i>Pan troglodytes</i>               | Metazoa, Chordata               | EMBL    |
| <i>Rattus norvegicus</i>             | Metazoa, Chordata               | Ensembl |
| <i>Takifugu rubripes</i>             | Metazoa, Chordata               | EMBL    |
| <i>Tetraodon nigroviridis</i>        | Metazoa, Chordata               | GB      |
| <i>Nematostella vectensis</i>        | Metazoa, Cnidaria               | JGI     |
| <i>Strongylocentrotus purpuratus</i> | Metazoa, Echinodermata          | GB      |
| <i>Caenorhabditis briggsae</i>       | Metazoa, Nematoda               | GB      |
| <i>Caenorhabditis elegans</i>        | Metazoa, Nematoda               | GB      |
| <i>Monosiga brevicollis</i>          | Choanoflagellida, Codonosigidae | JGI     |

---



arCOG00402

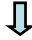

B3\_Theon1 : -----SSYKQDPNLYQIQTKERDDEVRPRFGVMRSREF-LMKDAYSFHLDMDTLMNETYEAMYQASNLISLR-VGLAFRFLVADTGSIGGSMSEHFVLAQSGEDLIAYSTESDVAANIEKA
B10\_Ch1ca1 : -----SGRKQDPNLYQIQATKFRDEIRPRFGLMRAREFF-LMEDSYTFSDSPEQMNQYAKLRQAKQONIEER-HEIKYVIVEADGGKIGKSEBFHVLCSLGEDI--CVSGANGANIEAA
B9\_Trepal1 : -----TSYKHFFPSLYQIQNAKYRDEIRPRYGLMRAREFF-TMADAYSFHDDCACLARTYEKFAHAKRAIFRR-HGLSVIAVHAHLGAMGGQSEBFFMVESAVDGNTLLCCHPCTVAANCEKA
B2\_Biflo1 : -----SSYKQDPNLYQIQTKYRDEIRPRAGLIRGRBF-VMKDAYSFTIDEEGMRKAYDERGAKERIEQR-IDLKYMVFAMSGPMGGASSEFLAMPPIGEDTFALAPSGK-AWNVEAL
B6\_Lacp11 : -----KSYKRPPTLYQIQAKYRDEIRPRYGLLRGRBF-IMKDAYSFHADDEASLDFTQDMAQAKONIEER-VGLKRSIIGDGGAMGGKDSREYSAPVGEDTIIVYSDASDVAANLEMA
B3\_Wolsul1 : -----KSYKQDPNLYQIQHLKFRDEIRPRFGLMRGRBF-VMKDGYSFHAEADLIRFEFLEMEATYKRITR-HGLDERVVEADSGAIGGSGKBFVLAQSGEDTIAVCDSCVAANIEAA
B4\_synsp2 : -----RSYRQDPNLYQIQVTKERDEIRPRFGLMRGRBF-IMKDAYSFHADDEADLQATYAVMDQAKRRIEER-CGLEAFVVDADSGAIGGAASQBFMVTAEBAGEDLILISDDGAJAANQKA
CA\_Hybul1 : -----KSYRQDPKYYQIVSIFRWEFRATRPMIRLREIVTTFKEAHTVHDSFADADROVAEALBYKKITDE-HGIPYVLSRRPE-----WDRF-----ACAVTIAFDT-
CA\_Calma1 : -----RDHTDLPNLYQIQVSVFRADTMTHPMLRLREISMFKEAHTAHADRDDEAERQVKEAVCIYRIMDE-HCLPYVLSRRPD-----WDRF-----ACAVTIAFDT-
CA\_Sulacl1 : -----QSYKQDPKYYQIVSVERWEFRATRPMIRLREIVSTTFKEAHTLHETYEDAERQVKEAIEIKNFTEE-HGIPYVMSORPE-----WDRF-----ACAVTIAFDT-
CA\_Pyrca1 : -----QDYKDPNLYQIQVSVFRADTMTHPMLRLREISMFKEAHTVHVDREDAERQVREAVEIKRITDE-HCLAYVNRPP-----WDRF-----ACAVTIAFDT-
CA\_Sulsol1 : -----KSYKQDPKYYQIVSVERWEFRATRPMIRLREITTFKEAHTVHETDYDDAQKQVEAEIKKIDT-HGIPYVLSERPE-----WDRF-----ACAVTIAFDT-
CA\_Aerpe1 : -----KSYRQDPKYYQIVSIFRWEFRATRPMIRLREIVTTFKEAHTVHESFEDAERQVLEAIEVYKALDEH-HLIPYVLSKRPE-----WDRF-----ACAVTIAFDT-
CA\_Thele1 : -----KDHTDLPNLYQIQVSVFRADTMTHPMLRLREISMFKEAHTAHADREDAERQVRAVEIKKITEDE-HCLPYVLSRRTE-----WDRF-----ACAVTIAFDT-
Me\_Caebr1 : -----MSDAIVKQSSHRDLPKLNQCNVVRWDFRPTFFLRTRBF-LWQEGHTAFANPSDAEKVQIIDLHAGVNDLHALPVVKGKKE-----KERF-----AGDPTTTVEA-
Da\_Phr2 : QDLSQFSHVSHPLKSHRDLPKLNQCNVVRWDFRPTFFLRTRBF-LWQEGHTAFATFEDADATVMEALDELRGVWEDLHAPVVPYKTE-----KERF-----AGFRTTTVEA-
Mi\_Entcul1 : RSHRDLPKLNQCNVVRWDFRPTFFLRTRBF-LWQEGHTAFATLRKESDEVEALIDLQSSQYSELHAPVVKGRKSE-----KERF-----GADYTTSLIA-
Ap\_Playol1 : DEDIKNMDEVIIHMRSHRDLPKLNQCNVVRWDFRPTFFLRTRBF-LWQEGHTAHNKEEAVKAVFDLIDLRWVEECLHAPVVKGLKSE-----KERF-----GANTSTNET-
En\_Enth1 : SGHRDLPKLNQCNVVRWDFRPTFFLRTRBF-LWQEGHTAFATQAAEKKECHEILBLVAVWEDLHAPVVKGRKSK-----GETF-----PCAYVSLTVEC-
Vi\_Ostlu2 : RSHRDLPKLNQCNVVRWDFRPTFFLRTRBF-LWQEGHTAYSKAECDEVRQIILELRRVVEEYHAPVVKGRKSE-----KERF-----AGDPTTTVEA-
Rh\_Cyame2 : RSHRDLPKLNQCNVVRWDFRPTFFLRTRBF-LWQEGHTAYADRSAADEEVLQIILELRRVVEELHAPVVKGLKSE-----KERF-----AGLTTTVEA-
EA\_Metbul1 : RSHADLPKLYQIVNTRFRWFRTRPLRLREITSFKEAHTVHATWDEAASQVEALRLREIYKRR-HAIPVPSKRPS-----WDRF-----PCADYTIADVS-
EA\_Metth1 : RSHDLPKLYQIVNTRFRWFRTRPLRLREITTFKEAHTVHATSEAEQVEAVEIKKEDNS-HGIPYVLSRRPE-----WDRF-----PCSEYVAFDT-
EA\_MetmC1 : KVHTDLPKLYQIVNTRFRWFRTRPLRLREITMSFKEAHTAHATKEDCDAITAEALNGBEFDH-HCVPYVLSKRPE-----WDRF-----PCADYTIADVS-
EA\_Uncme1 : RSHADLPKLYQIVNTRFRWFRTRPLRLREITSFKEAHTAHATWDDAKQVHEAMDLSEFFTK-HAPVHVKRPE-----WDRF-----PCADYTIADVS-
EA\_Arcf1 : NAFYAEKRALIGIKLRNHADLPKLYQIVNTRFRWFRTRPLRLREITSFKEAHTVHKDFEAAAEHVKAALGFYKEDFD-HAPYVLSRRPE-----WDRF-----PSAATIAFDT-
EA\_Metkal1 : RSHADLPKLYQIVNTRFRWFRTRPLRLREITTFKEAHTAHATEEEAEQVKEAVEIKSSPDE-HGIPYVLSRRPE-----WDRF-----PCSEYVAFDT-
EA\_Metsal1 : RSHADLPKLYQIVNTRFRWFRTRPLRLREITSFKEAHTAHATWEEAAQVEIAIQRIIEYKRR-HAIPVPSKRPS-----WDRF-----PCADYTIADVS-

Fig. S2a

arCOG00415 – EA synapomorphy

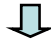

B11\_Deiral1 : DVQVSTGSLSLDLALGVGELPRGRITTEIYGPESSGKTTALALVAQAQ-----KAGGTCARIDAEHALDEVYARAL-----GVNT-----DELLVQSPDNGEQALE
B6\_Mycga1 : DLEAISTGSIKLDHALGTDDEFIKRIVVEIYGNESCCKTTALSTIKQAI-----DRNMRVARIDAEHALDLRYVKRL-----GIDL-----TKLITARPDEGEQGE
B6\_Mycge1 : ELETISTGSLNLDHALGSGELPLGRIVVEIYGNESCCKTTALNAVASFQ-----KAGKTACYIDAEHALDLAYAKST-----GIDL-----NKLITARPHGENAFA
B6\_Urepal1 : KINALSTGSIHIDQITGINLPPVKGITTEIYGNESCCKTTALQTIABEQ-----KTGTVVLLDLEGSEINDYAKSL-----KVDL-----TKLITQPQTEQAFD
B6\_Mycpe1 : --QVIRKSGSILLDNAIGVGEYPKGKITTEIYGNESCCKTTALQCVKECI-----KEGGSVAMIDAEHALDIDSKYISEL-----GIDP-----TKLITATPEYGEQAFS
B6\_Lacla1 : KVSVSSGSLALDIALGAGEYPKGRIVVEIYGNESCCKTTALHAVAAVQ-----KEGGIAARIDAEHALDEYAKAL-----GVNI-----DELLVQSPDNGEQGLQ
B9\_Borbul1 : GIKSMSSGIVLDEALGIGGYPRGRITTEIYGNESCCKTTALQIAEAVQ-----KEGGIAARIDAEHALDEYAKAL-----GVNV-----AELVQSPDTEGEQALE
CA\_Pyrca2 : QRRVFRGVSEFDEKTPWRGIREAFIYEFAGEFGACKSMIAHQLSVAAL-----AQGFTTRVVVIDEGEENDGLVEAVA-KRF-----GIDV-----DKALEAVVYQPANVQLEQ
CA\_Thete1 : QYRVFRGVSEFDEKTPWRGIREAFIYEFAGEFGACKSMIAHQIAVKSV-----AEGFDVVVIDEGEENSQJVERIA-SRF-----NAQG-----VLDKIVVMPDNVSLFA
CA\_Thepe3 : QRESLITGKALDELLLE-GLVLTQBYEFAGEYGSCKTQCHQLSVTAQLPPSRGGLGKVVVIDEGEENSBSRIERTIA-ERF-----GVEG-----ALEGVVVARPISVDELEE
CA\_Pyri1 : QVKTFRGVSEFDEKTPWRGIREAFIYEFAGEYGTGKSMIAHQIAVAVGL-----KEGFTARVVVIDEGEENPTLVETIA-RRF-----GVEI-----ERLDTSLVYQPANVQLEQ
CA\_Pyrca2 : QVKAFRGVSEFDEKTPWRGIREAFIYEFAGEFGACKSMIAHQASVAAL-----REGFTARVVVIDEGEENEALEAVA-RRF-----EDDV-----ERIDSLVYQPANVQLEQ
CA\_Pyrca1 : QRRAFRGVSEFDEKTPWRGIREAFIYEFAGEFGACKSMIAHQLSVAAL-----AQGFTTRVVVIDEGEENDGLVEAVA-KRF-----NFDA-----DKALEAVVYQPANVQLEQ
Oo\_Phyra1 : NKIFITGSRQLDQILG-GELETMSVTEVHGEFRGCKTQCHTLVTAQLPRLSRGGLGKVAVIDEGEENRENRVIAERY-----NDDP-----DDVLDLVARHSDHQML
Ap\_Cryp1 : NILRITGSEQFQMLM-GEFESMCTEVEFNRCCKTQCHTLVVAQLPLEMGGNGKVAVIDEGEENRENRVIAERY-----GVQG-----DVALDNMVARAYTHEHLNQ
Vi\_Poptr1 : SVIRITGSEQALDELLG-GELETSATDAFSEFRSCKTQCHTLVSVTQLPTQMHGGNGKVAVIDEGEENRENRVIAERY-----GMDP-----GAVLDNMYARAYTHEHQYN
Fu\_Schpo2 : KVMISGSEALNGLG-GEIQSMSTEVFGEFRGCKTQCHTLVTAQLPRLMGAEGKVAVIDEGEENRENRVIAERY-----GVDA-----DQAMENHIVSRAYNSEQME
Ci\_Teth1 : QIRRIITGSKALDDILN-GELESQSTEVFGEYRSGCKTQCHTACVLAQ-SQDHCQSPGKVLVIDEGEENRENRVIAERY-SHY-----GVEG-----EYALDNMIVGRAYNVQDQT
En\_Enth1 : NVIKITGSSQFDQLLG-GELETMSVTEVHGEFRGCKTQCHTLVAVTQLPSHLKGGKVAVIDEGEENRENRVIAERY-----GVQD-----TAVLDNMYARAYTHEHQFD
EA\_Metsa1 : LVKKITGSRNFRILG-GELETQAVVLYGSEFRGCKTQCHQLAVNVQLPPRLGNGSVAVIDEGEENRENRVIAERY-MGI-----RAT-----DNRFRWRP-----EDFTKNMVARAFNSHQHIL
EA\_Theko1 : SVEVDYNDVYDVLVIP---ETHNFIAPN-LVLHNTQCHTLVAVVQKPEEGGLGKVAVIDEGEENRENRVIAERY-ENR-----GIDP-----EETLKNMVARAFNSHQHIL
EA\_Metst1 : DVGRITGSKGLDELIG-GELETQSTEVYGEFGSCKTQCHTLVAVVQKPEEGGLGKVAVIDEGEENRENRVIAERY-EGF-----GUNI-----EEVLKKNMVARAFNSHQHIL
EA\_Pictol1 : EIKKITGSSNLDNLG-GELETQSTEVFGEFGSCKTQCHQLAVNVATMPVEKNGFSDVVIDEGEENRENRVIAERY-RAK-----DIDP-----DQTLERHIVGRAYNSHQHIL
EA\_Metla1 : DVLIKITLVPEIDELFG-GELETQAVTELYGSEFGSCKTQCHQLAVNVQQLPQLGGLGKVAVIDEGEENRENRVIAERY-EGE-----ELADLPEGYVPTPDEFNANMVARAFNSHQHIL
EA\_Halwa1 : EIGKITGSKLPEVDLLG-GELETQSTEVYGEFGACKSMIAHQAVNVQLPPHGGGLGAAIIVDSDENRRENRVIAERY-RGLDDEIITDILLERREIETPGDDEYKALLDSFDLHIVAKAFNSHQHIL
EA\_Pyrab1 : SIGRITGSKSLKLLG-GELETQAVTEVGEFGSCKTQCHTLVAVVQKPEEGGLGKVAVIDEGEENRENRVIAERY-KNR-----GIDP-----DEVLKKNMVARAFNSHQHIL

Fig. S2b

arCOG01924

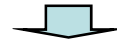

B2\_Coref1 : AYLLDLIH-DSDKVVLTSSQRNSNDGIGYDGDINLVDAI--TVA---GAPEARGQCVLAFAGG---HPFARGTRKRLHTIDPSPFEGG--TGFHGYVTG--GAGFPHATA----RRGPALPPPPDRGF  
 B6\_Lisin1 : NYFDLAV-TDAREIVVTSSQRAPEEBCGTDAYVNIIRRI--YTA---CEVNLKQAGTVVFNER---LFDARVTRKTHASNIQGFSAFQFGYIGIID-----NDQVFLYQKPLEHECFDRLD  
 B3\_Vibpa2 : NYFDLTV-KSDKPVIVGAMRPTSTAMSADGPNVNIYNAV--VTA---TDEDSKRGVLIAMNDT---LFDARVTRKTHASNIQGFSAFQFGYIGIHN--SDAKYQRSPEKHHTETFPDYSKLNTL  
 B6\_Staau1 : AFLDLLL-GLEQVVIITGAMSSNEIGSDGLYNIISAI--RVA---SDEKARHKGVVVFNDE---LHTAANVTRKTHASNIQGFSAFQFGYIGIHN--SDAKYQRSPEKHHTETFPDYSKLNTL  
 B3\_Agrtu1 : SLMLVHQLH-ALPKFVVTGAAFTADHRQADGSPANLARI--ETA---LDQRNAEKGVVLSFGGR---CLPAWGLYKLSADAADAFRS---ARPOVQ-----AAAPKLAAPVT  
 B11\_Deiral : AFTLHCL-PAGLEVLTGSMRHAEEVSDGPGNLDAA--QVA---LCPQTAGRGVIVVFGGD---LFDARTVTRKTHASNIQGFSAFQFGYIGIHN--SDAKYQRSPEKHHTETFPDYSKLNTL  
 B3\_Brume2 : AFLDLLLW-EHPQLVLTGAMRSPRAPGADGSPANLARI--LTA---ASRLSREKGVLIAMNDT---LHAARVTRKTHASNIQGFSAFQFGYIGIHN--SDAKYQRSPEKHHTETFPDYSKLNTL  
 CA\_Calma1 : AAATAFAIKSAPGVVIVGCAORSSDRPSSDAALNIGAT--VVA---VHAPFAESVIAMHGSVNDTILVHRGVTRKTHASNIQGFSAFQFGYIGIHN--SDAKYQRSPEKHHTETFPDYSKLNTL  
 CA\_Thepe1 : AAATAFAVQEPGVVIVGCAORSSDRPSSDAALNIGAT--VVA---VHAPFAESVIAMHGSVNDTILVHRGVTRKTHASNIQGFSAFQFGYIGIHN--SDAKYQRSPEKHHTETFPDYSKLNTL  
 CA\_Stama1 : AAATAFAIKNKPVVIVGCAORSSDRPSSDAALNIGAT--VVA---VHAPFAESVIAMHGSVNDTILVHRGVTRKTHASNIQGFSAFQFGYIGIHN--SDAKYQRSPEKHHTETFPDYSKLNTL  
 CA\_Pyrca1 : AAATAFAFREAPGVVIVGCAORSSDRPSSDAALNIGAT--VVA---VHAPFAESVIAMHGSVNDTILVHRGVTRKTHASNIQGFSAFQFGYIGIHN--SDAKYQRSPEKHHTETFPDYSKLNTL  
 CA\_Thet1 : SAATAFAFKETPGVIVIVGCAORSSDRPSSDAALNIGAT--VVA---VHAPFAESVIAMHGSVNDTILVHRGVTRKTHASNIQGFSAFQFGYIGIHN--SDAKYQRSPEKHHTETFPDYSKLNTL  
 CA\_Hypbu1 : SAATAFAFRGLVGVIVIVGCAORSSDRPSSDAALNIGAT--VVA---VHAPFAESVIAMHGSVNDTILVHRGVTRKTHASNIQGFSAFQFGYIGIHN--SDAKYQRSPEKHHTETFPDYSKLNTL  
 CA\_Pyris1 : AAATAFAFKSAPGVVIVGCAORSSDRPSSDAALNIGAT--VVA---VHAPFAESVIAMHGSVNDTILVHRGVTRKTHASNIQGFSAFQFGYIGIHN--SDAKYQRSPEKHHTETFPDYSKLNTL  
 Da\_Thaps1 : ATALSFMLENLGRVIVVFTSSQVPIAQPHSDAREMIMAL--IFA---LRDVPICEVTFHFHR---LIRACRSKVVNTGALLAENSPNIPPELATVG--ISIDENSHLIL--PPARGVLRVHTDM  
 Vi\_Ostta1 : ASALSMLLEGFKRIVVLTSSQLPLAYPRSDARQNLDAITCTIVGSKSCGGVDFYVAVCFNKG---LIRGNRAOCTSAIVYAARSSPSYPALARLG--VGVDMNHARLLPQEQYTPFRD--V  
 Fu\_Cryne1 : AALSFLFKDAGKIVVVTGAILPLSRERSDGTNLDLSD--FVA---GVLPYAGVGVVFNQO---VMGTRATRTSPNLFAPATPCIPPIINLN--VKTLDSTLSLAPRSITPPAPLIAINA  
 Fu\_Ustma1 : ASALSMLLENLGRVIVVFTSSQVPLSELRLNDIENLGLAI--MLA---GSYIIPVGVHFFAST---LIRGNRTSKVSNALAAEDSPNMAPARVG--INLEAVANLVER--SRTVKGFRAHDKM  
 Dp\_Giala2 : ASALSFLLENLGRVIVVFTSSQVPLSELRLNDIENLGLAI--MLA---GSYIIPVGVHFFAST---LIRGNRTSKVSNALAAEDSPNMAPARVG--INLEAVANLVER--SRTVKGFRAHDKM  
 En\_Enthi2 : SSILSFMFENLKTIVVVTGAILPLSRERSDGTNLDLSD--FVA---GVLPYAGVGVVFNQO---VMGTRATRTSPNLFAPATPCIPPIINLN--VKTLDSTLSLAPRSITPPAPLIAINA  
 Me\_Nemve3 : ASALSFMFENLKTIVVVTGAILPLSRERSDGTNLDLSD--FVA---GVLPYAGVGVVFNQO---VMGTRATRTSPNLFAPATPCIPPIINLN--VKTLDSTLSLAPRSITPPAPLIAINA  
 EA\_Metma1 : AAALSSEMI-ETPVVIVIVGCAORSSDRPSSDAALNIGAT--VVA---VHAPFAESVIAMHGSVNDTILVHRGVTRKTHASNIQGFSAFQFGYIGIHN--SDAKYQRSPEKHHTETFPDYSKLNTL  
 EA\_Thev1 : SSALSSEMI-ETPVVIVIVGCAORSSDRPSSDAALNIGAT--VVA---VHAPFAESVIAMHGSVNDTILVHRGVTRKTHASNIQGFSAFQFGYIGIHN--SDAKYQRSPEKHHTETFPDYSKLNTL  
 NA\_Nameq1 : SAYAYVAL-ENPIVIVIVGCAORSSDRPSSDAALNIGAT--VVA---VHAPFAESVIAMHGSVNDTILVHRGVTRKTHASNIQGFSAFQFGYIGIHN--SDAKYQRSPEKHHTETFPDYSKLNTL  
 EA\_MetmC1 : ASALSSEMI-TSEVIVIVGCAORSSDRPSSDAALNIGAT--VVA---VHAPFAESVIAMHGSVNDTILVHRGVTRKTHASNIQGFSAFQFGYIGIHN--SDAKYQRSPEKHHTETFPDYSKLNTL  
 EA\_Metst1 : ASALSSEMI-DSPVIVIVGCAORSSDRPSSDAALNIGAT--VVA---VHAPFAESVIAMHGSVNDTILVHRGVTRKTHASNIQGFSAFQFGYIGIHN--SDAKYQRSPEKHHTETFPDYSKLNTL  
 EA\_Pictol : ASALSSEMI-DSPVIVIVGCAORSSDRPSSDAALNIGAT--VVA---VHAPFAESVIAMHGSVNDTILVHRGVTRKTHASNIQGFSAFQFGYIGIHN--SDAKYQRSPEKHHTETFPDYSKLNTL  
 EA\_Arcful1 : AAALSSEMI-STPKVIVIVGCAORSSDRPSSDAALNIGAT--VVA---VHAPFAESVIAMHGSVNDTILVHRGVTRKTHASNIQGFSAFQFGYIGIHN--SDAKYQRSPEKHHTETFPDYSKLNTL

Fig. S2c

arCOG04169 – CA synapomorphy

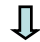

B6\_Strmul : --LVKTFNVQTFLLIGAILTAGSVVTVWGDQSD--KFFENVSYSIFAGLISSTPGTIKSVYEDYF--VNIRESSEMKNSLIFVGL-----LILASITII  
 B6\_Mycpe1 : QSALSSVPAGQIILLGLMGTAGTYTHFTSDIISK-RGVNMYTHLHLSGVASHYFNPTSVF--Q---VLTGSSQISNOQLRYFS-----FAYVILMFFLIL  
 B3\_Desvul : APVVLEAGWAFRLVITITLTAGTVLHMLGQTE-KELGNISLIFSGVAGIPGGI-----LKSQAQLISAGDLSLFAA-----LVIILMGLML  
 B6\_Mycpu1 : IDQEFKTIANIYVLPILVAGSIFTEFLSDQITD-KGIGNETSILFSGSLSLSPQFRAAFNVLV--GTNKTTLTFLSHFLY-----LPGYLDLI  
 B2\_Mycho1 : LDIIADQSIFTLVIVVVTGGAALVVMGELITE-RGIGNESLILFVGAARIPAEQSI-----LESRGGVVFVAACA-----AAITII  
 B6\_Cloacl : ----TNSKLSVFLIITLTAASTFVWGDQITD-KGIGNETSILFVGNISLIRFPSTIYNI-----VKLQSDATVNIIVVVV-----AVIACVLF  
 B11\_Deiral : W----DPGLFTVLMVYTOVAGIAPTWIGERITE-VBIGNESLITAGLIAVYPREIAAT-----AQLLRSEQTTLISILAF-----LAVIIVTI  
 CA\_Aerpe1 : ---AIEPGPLDYALVSDQFLGALIVYFDEWQKWCIGSALSFLLAGAQQGVVWSIFG-----TIPGVAQDYSLVPAIIS-----NPDLLLLARP----NGFPDLTGFFTHAAI  
 CA\_Pyrca1 : -----PLGGVLIIVDOLLATVITLDDLDMSKGCWIGSALSFLIFLGSRQFLSLSFSD--TVQ--DSNGNTQVFLPALGVALY---DLFTSGNANTLLGLVNRPLVNTYLPDFVGLVATLLEF  
 CA\_Sultol : -----LSAIVTHQIVATYITLDDDMIQKGCWIGSALSFLIFLGSRQFLSLSFSD--TVQ--AVSNQNLVGFPPVFLIS--D---IVSGKNI LSLIVNTSTTT---PFQDPLVGLISTHGLI  
 CA\_Censyl : -----VYLIHIGQIMASSIILFDELLQKGCWIGSALSFLIFLGSRQFLSLSFSD--TVQ--LPAGDGFVAGIFFFIQO--W---ASVGMGNFEDIFFFRYN---QLPSIFGLLGGVLL  
 CA\_Thepe1 : -----QQQQLIVFQVFASTFVILNDMIEKGCWIGSALSFLIFLGSRQFLSLSFSD--TVQ--GLPGDGLYVGLFSPLES--A---LVSGN--STLIMHVVVVRP---SGYDPLVGFVGMVVVL  
 CA\_Calma1 : --QLTVANAGLAFIIVWQLFGAVVILDDLSKGCWIGSALSFLIFLGSRQFLSLSFSD--TVQ--VTVGAGELELIPALVAAYV---SAAVSHTLAPLLSIVYRF---NLPGLLGLIATVIVG  
 CA\_Hypbu1 : PPISTA----VKIIVVQIVFATLVLMWFDMLRNGWIGSALSFLIFLGSRQFLSLSFSD--TVQ--TPEGQVPPYVVAHVVS-----TGD--LGVL---RR---GMPDMVGLIATVIAI  
 Dp\_Giala1 : ----QIGLFSAVANIAQITISSILVQVDEMDENGWIGSALSFLIFLGSRQFLSLSFSD--TVQ--DRNGKFEFGVLAHVH--Y---MFTQPNKKAIAKLAFFRD---GLTNVMIATVIVF  
 Ap\_Thepa1 : ----DIGVFKSVLIIQDFFAGVIVLFDMDIQKGCWIGSALSFLIFLGSRQFLSLSFSD--TVQ--STDKGTEFGCAISLFLY--C---FFTCKNKLSAFKAFYRN---HAPNVNIALALAL  
 Fu\_Yarli1 : DSAVSELSGAAVLIQAQTAAGIIVLGLPIVDKYSFSSSGSFLIAGAAQQLFVGLFSP-----LLKVGQFVFLSPPALMGLWKNGLFENFGGSYRYVIENSFFRQ---NLPNLQVGMVAIVF  
 Vi\_Orysa3 : ----VLGAGNAVIVLQVVLGGMVAIFDELLQKGCWIGSALSFLIFLGSRQFLSLSFSD--TVQ--DRGRGAEVGAATAAAH--L---LATRARKLSAVREAFFRQ--GGGSLPDLRGLAATCAIF  
 Fu\_Yarli2 : ----DLGVGVCLLILFQVLAALVILDDLSKGCWIGSALSFLIFLGSRQFLSLSFSD--TVQ--NKGRYGFEBAIVAFVH--L---LFTRKDKKRAIEAFTRO---DLPNMSQVITVIAIF  
 Mi\_Encuc1 : ----SIGTYICLLVQVLFSGIILHDELQKGCWIGSALSFLIFLGSRQFLSLSFSD--TVQ--FTGRGTEFGSIALFH--L---LVVRNKNFAAIEAFFRQ---NLPNLQVGMVAIVF  
 Fu\_Debha1 : D----SVPTTLVILFQVVTMSFTTILVGLFDKGCYCFSSGLCVAIQVATNLRDVLVGL--LVSLPNSKFEYSGAAMNFIK--NF---RINFKSLNLYNLSFTFR---QLPNLQVGMVAIVF  
 EA\_Pictol : HVVPGYGEFLAQTHIILQDFFGSYLVFLVDEVSK--YGLGSEGLIADYSGQFIQITFNWLPSTITSPLSLNSPPASAAHPKALYLFW---MAGPSYLTNTGMEQILFA---QPNMIALIGVVAIVF  
 EA\_Metst1 : ----NDYVVLVILQVVLGGIILYDEVVSK--WGFSSGGLIADYSGQFIQITFNWLPSTITSPLSLNSPPASAAHPKALYLFW---MAGPSYLTNTGMEQILFA---QPNMIALIGVVAIVF  
 EA\_Metja1 : ----PLLAFLVILQVAFGSILYDEVVSK--YGLGSEGLIADYSGQFIQITFNWLPSTITSPLSLNSPPASAAHPKALYLFW---MAGPSYLTNTGMEQILFA---QPNMIALIGVVAIVF  
 EA\_Metba1 : ASSLGVGLGVITFDLILQVFIGGAILVFLDEVVSK--WGFSSGGLIADYSGQFIQITFNWLPSTITSPLSLNSPPASAAHPKALYLFW---MAGPSYLTNTGMEQILFA---QPNMIALIGVVAIVF  
 EA\_Metka1 : ----EPTLLELILQVFIGGAILVFLDEVVSK--WGFSSGGLIADYSGQFIQITFNWLPSTITSPLSLNSPPASAAHPKALYLFW---MAGPSYLTNTGMEQILFA---QPNMIALIGVVAIVF  
 EA\_Halspl : --MPGGAFGVVLIQAQTAAGIIVLGLPIVDKYSFSSSGSFLIAGAAQQLFVGLFSP-----BGGVSGQVLPVTFD--I---IVGNVSNMPPLLSSGSEIPLMQA--GILGLITVIAIF  
 EA\_Metcu1 : TQFFGGNMILVSLIILQVCLGGLIIVVLDVETVK--WGVSSGGLIADYSGQFIQITFNWLPSTITSPLSLNSPPASAAHPKALYLFW---MAGPSYLTNTGMEQILFA---QPNMIALIGVVAIVF

Fig. S2d



arCOG04255

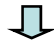

B10\_Chlcal : KTKTPRRKPSALRRVAVRRL-SNGQEVYAYIPGEE--HNQDHSVLLVQG--SRVK-----DLE-----GVRVHTVLR--GALDCAAVKNNKQSR-----DLE
B3\_Ricco1 : KTKTPRRKPSALRRVAVRRL-SNKRTVWYAYIPGEE--HSVQDHDVLLVRE--QVVP-----DLE-----GVRVHTVLR--GAYDIAGVKGRKQGR-----DLE
B2\_Myco1 : YTTTPRRKPSALRRVAVRRL-TSQVEVYAYIPGEE--HNQDHSVLLVQG--SRVK-----DLE-----GVRVHTVLR--GSLDTQCGVMKNNKQAR-----DLE
B6\_Mycpu1 : ATYTPRRKPSALRRVAVRRL-SNGMVEYAYIPGEE--HNQDHSVLLVQG--SRVK-----DLE-----GVRVHTVLR--GTQDAGVNNKNNKQAR-----DLE
B6\_Bacce1 : GTYTPRRKPSALRRVAVRRL-TNGIEVYAYIPGEE--HNQDHSVLLVQG--SRVK-----DLE-----GVRVHTVLR--GALDTAGVDRKNNKQGR-----DLE
B9\_Borbul : MTYTPRRKPSALRRVAVRRL-SNGFVEYAYIPGEE--HNQDHSVLLVQG--SRVK-----DLE-----GVRVHTVLR--GAKDTLGMVNNKNNKGR-----DLE
B6\_Myca1 : GTYTPRRKPSALRRVAVRRL-TNGMVEYAYIPGEE--HNQDHSVLLVQG--SRVK-----DLE-----GVRVHTVLR--GTLDTTGVDRKNNKQGR-----DLE
CA\_Aerpe1 : VGVEARQPSALRRKCVRVQLVKNKKVYTAFAVVRDCEGLYVDHDEBVIIEIGSPRGRSM--GDIP-----GVRVHTVLR--GVRVHTVLR--GALDLAGVDRKNNKQGR-----DLE
CA\_Pyrca1 : VGVEARQPSALRRKCVRVQLVKNKKVYTAFAVVRDCEGLYVDHDEBVIIEIGSPRGRSM--GDIP-----GVRVHTVLR--GALDLAGVDRKNNKQGR-----DLE
CA\_Sulso1 : VGLESROPNSAVRRKCVRVQLVKNKKVYTAFAVVRDCEGLYVDHDEBVIIEIGSPRGRSM--GDIP-----GVRVHTVLR--GALDLAGVDRKNNKQGR-----DLE
CA\_Thepe1 : VGLESROPNSAVRRKCVRVQLVKNKKVYTAFAVVRDCEGLYVDHDEBVIIEIGSPRGRSM--GDIP-----GVRVHTVLR--GALDLAGVDRKNNKQGR-----DLE
CA\_Hypbu1 : VGVEARQPSALRRKCVRVQLVKNKKVYTAFAVVRDCEGLYVDHDEBVIIEIGSPRGRSM--GDIP-----GVRVHTVLR--GALDLAGVDRKNNKQGR-----DLE
CA\_Sulac1 : VGLESROPNSAVRRKCVRVQLVKNKKVYTAFAVVRDCEGLYVDHDEBVIIEIGSPRGRSM--GDIP-----GVRVHTVLR--GALDLAGVDRKNNKQGR-----DLE
CA\_Stamal : VGVEARQPSALRRKCVRVQLVKNKKVYTAFAVVRDCEGLYVDHDEBVIIEIGSPRGRSM--GDIP-----GVRVHTVLR--GALDLAGVDRKNNKQGR-----DLE
En\_Enthil : LGLETHROPNSAIRKCVRVQLVKNKKVYTAFAVVRDCEGLYVDHDEBVIIEIGSPRGRSM--GDIP-----GVRVHTVLR--GALDLAGVDRKNNKQGR-----DLE
Ki\_Leimal : IGVGARQPSALRRKCVRVQLVKNKKVYTAFAVVRDCEGLYVDHDEBVIIEIGSPRGRSM--GDIP-----GVRVHTVLR--GALDLAGVDRKNNKQGR-----DLE
Mi\_Enccu1 : IGVGARQPSALRRKCVRVQLVKNKKVYTAFAVVRDCEGLYVDHDEBVIIEIGSPRGRSM--GDIP-----GVRVHTVLR--GALDLAGVDRKNNKQGR-----DLE
Dp\_Giala1 : IGVGARQPSALRRKCVRVQLVKNKKVYTAFAVVRDCEGLYVDHDEBVIIEIGSPRGRSM--GDIP-----GVRVHTVLR--GALDLAGVDRKNNKQGR-----DLE
Ci\_Tetth1 : IGVGARQPSALRRKCVRVQLVKNKKVYTAFAVVRDCEGLYVDHDEBVIIEIGSPRGRSM--GDIP-----GVRVHTVLR--GALDLAGVDRKNNKQGR-----DLE
Vi\_Orysa10 : IGVGARQPSALRRKCVRVQLVKNKKVYTAFAVVRDCEGLYVDHDEBVIIEIGSPRGRSM--GDIP-----GVRVHTVLR--GALDLAGVDRKNNKQGR-----DLE
Me\_Ratno8 : VGEADREPSAVRRKCVRVQLVKNKKVYTAFAVVRDCEGLYVDHDEBVIIEIGSPRGRSM--GDIP-----GVRVHTVLR--GALDLAGVDRKNNKQGR-----DLE
EA\_Picto1 : VGVEARQPSALRRKCVRVQLVKNKKVYTAFAVVRDCEGLYVDHDEBVIIEIGSPRGRSM--GDIP-----GVRVHTVLR--GALDLAGVDRKNNKQGR-----DLE
EA\_Uncm1 : VGVEARQPSALRRKCVRVQLVKNKKVYTAFAVVRDCEGLYVDHDEBVIIEIGSPRGRSM--GDIP-----GVRVHTVLR--GALDLAGVDRKNNKQGR-----DLE
EA\_Metcu1 : VGVEARQPSALRRKCVRVQLVKNKKVYTAFAVVRDCEGLYVDHDEBVIIEIGSPRGRSM--GDIP-----GVRVHTVLR--GALDLAGVDRKNNKQGR-----DLE
EA\_Metst1 : VGVEARQPSALRRKCVRVQLVKNKKVYTAFAVVRDCEGLYVDHDEBVIIEIGSPRGRSM--GDIP-----GVRVHTVLR--GALDLAGVDRKNNKQGR-----DLE
EA\_Halma1 : VGVEARQPSALRRKCVRVQLVKNKKVYTAFAVVRDCEGLYVDHDEBVIIEIGSPRGRSM--GDIP-----GVRVHTVLR--GALDLAGVDRKNNKQGR-----DLE
EA\_Metacl : VGVEARQPSALRRKCVRVQLVKNKKVYTAFAVVRDCEGLYVDHDEBVIIEIGSPRGRSM--GDIP-----GVRVHTVLR--GALDLAGVDRKNNKQGR-----DLE
EA\_Metsa1 : VGVEARQPSALRRKCVRVQLVKNKKVYTAFAVVRDCEGLYVDHDEBVIIEIGSPRGRSM--GDIP-----GVRVHTVLR--GALDLAGVDRKNNKQGR-----DLE

Fig. S2e

arCOG05412

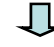

B6\_Strpn2 : -DI-DGDA---NVLAMHYHRRVQSC LKHNVIPFVSDHHDSEQKMLE-----TG--DVLN-RENDRIRVARECFQEFTE-VKHMFTINELMSLAAGQ--YIGGQFPNHHF-----
B6\_Myco1 : -DG-NGAL---NKKGQHQHDVDEI LKHGIEPVITVYHDDIPLADEQ-----QG--GWTNRDLIPAEVRYRQVLFKEXYGHKVKYMLTINQNMVAMVGDILGMVSSDDEKNNRW-----
B6\_Lacp110 : -DFETASL---NADGAFVFNHIDS LAHHTIPYINHHDDIPLAVLYD-----KYH--SWES-KHVLELDFVREBQCFKFLGDRVDHMYTINQKVVVDGQ--YLYGWHYBQVIN-----
B6\_Lisin6 : -NR-QGDI---NLKGEFVQNLDTCKKYDIEPFTVLYYHDDIPLAVLYD-----TG--GULD-HDVCABEETVAVKVCYDHFQDKITMWTTPNEKWFVANG--YKIGNVYBQYD-----
B6\_Lacla5 : -DG-RGEV---NQAGKFEDEIIDEIANEIEPIVITVYHDDIPLAVLYD-----LYG--SWES-REIADVFNHDEVLFNAFKGKVKYQVVSLEONIFTSQG--WSLATHPPKRD-----
B6\_Strpn4 : -QG-CGRV---MTQGDFVRRVFEAKAKGIRLLNLYYHDDIPLAVLYD-----DGD--SWEN-KATVSAREDFARECFETYGLVDQMIIDFNEHIVPVEFG--YFYDAHYPHKVD-----
B6\_Oceih1 : -DYENAIV---DEEYAAVDDVEIKIQNGVEPMCEHEHVEVAVDFE-----KYG--SWES-KHVLELDFVREBQCFKFLGDRVDHMYTINQKVVVDGQ--YLYGWHYBQVIN-----
CA\_Calma2 : NESALEEDRLALNANHHNRGHLSDWKERGGLLVNLYYHDDIPLAVLYD-----KRS-VIEBTRFAFIAHELGLDADMYTINQKVVVDGQ--YLYGWHYBQVIN-----
CA\_Calma3 : DENDLKRDEAANQEAARHREHREHSDLKARGIHFIINLYYHDDIPLAVLYD-----VKTVINBARFAAFYATWAKEDDLADEYSIMNEENVVHNSGYMMVKSGFPEGYLN-----
CA\_Sulac1 : NESKLRDNYANHEASHRQLEDDRNRRGFHVINLYYHDDIPLAVLYD-----SRTVYBARFAAFYATWAKEDDLADEYSIMNEENVVHNSGYMMVKSGFPEGYLN-----
CA\_Sulso1 : NENELKRDEYANKDAHNRHREHREHSDLKARGIYFIINLYYHDDIPLAVLYD-----QYL--SWLS-PNIWEARADTADCFQTEGDRVKDMEFIDNEBRCVAALG--YDNGFHAGRCS---GCDAGG
Me\_Cioin5 : -NGNTSNL---NQAGNDYNAIDSISAGVEPVITVYHDDIPLAVLYD-----NG--GLLN-DVIELNDVYANECFKTFGNRVKFIIDNEEYVVTWLG--YIGVGFABGVYS-----
Me\_Caeel2 : -DGTLSLI---NEEGKFRDLCCLLKENNIEPVITVYHDDIPLAVLYD-----NGT--ALLN-RENCEHEHEFADLCFQKFGDLVKTITITVYINQCAWGS--IVKVEGFWLCF---ERPEIE
Fu\_Gibze1 : -GGRNDFP---NQAGDHRKEVDDLDAGITPFTVYHDDIPLAVLYD-----RYG--GLMNREFFPLDFEYVAVRVMFEAL-PRCKNIDDEHEWCSAILG--YSTGSNAGRCSDR--NKSDBG
Vi\_Ostlu1 : -DGSA---IDEGFEYQNFALRERGVPEFHTVYHDDIPLAVLYD-----AVYK-DEIKDBERYADAVYFRLGKGIKYWTITISEKTVAMG--YXAGLHAGRRS---
Vi\_Orysa42 : -NG-TGMV---NQEGDYNNRDIYVKKGIKPIANLYYHDDIPLAVLYD-----QYL--SWLS-PNIWEARADTADCFQTEGDRVKDMEFIDNEBRCVAALG--YDNGFHAGRCS---GCDAGG
Oo\_Phyra15 : -DTQLQRM---WPNQOGHAFHHALDDIQANKLQAVITVYHDDIPLAVLYD-----QLEPKSGLN-PEIDHREDFAEALAFREFGHKVAYADAFVYQOT-----YGSCTAAGGGMQ-----
Vi\_Orysa31 : -SG-RGAV---NPKGQDFNNINEVYKAGIQIQVAYIYSDIPLQSQDQ-----EYQ--GWIN-PKIDDTAFADVCFREFGDRVAVHTVYLEENVMAQGC--YDGTGILFPHNCSYFFGNCTGG-----
EA\_Pyrfu1 : PESTIKELKIANMEAEHEHNRKYSDDWKERGKTFIINLYYHDDIPLAVLYD-----EKTVEBVEVAVVAVVAVKEDQYVDYMAFDPEEMVTVELGYLAPYVGVPEGILN-----
EA\_Pyrfu2 : KENLEEDQLANHREHEHNLVLRNKKLGGTFTVYHDDIPLAVLYD-----EKTVEBVEVAVVAVVAVKEDQYVDYMAFDPEEMVTVELGYLAPYVGVPEGILN-----
EA\_Thea1 : TRDRLDKDKIANKDAHNRHRSFSDKRRNGYLIINLYYHDDIPLAVLYD-----RDIIEKDNVAGNCT-TRSIYBARFAAFYATWAKEDDLADEYSIMNEENILF--NGQCSNDWRDSMA-----
EA\_Picto2 : NEGSLKDRLANQKANNRMEHFNKKNMNTLIVYHDDIPLAVLYD-----HKTVEBVEVAVVAVVAVKEDQYVDYMAFDPEEMVTVELGYLAPYVGVPEGILN-----
EA\_Thevo1 : NNNILSELDKYVMDANHEHIEHFNDRNRNIDLIINLYYHDDIPLAVLYD-----DRIVQLAELESYIVYRMEDELAVASIMNEENVVYNGGFNINIKSGFPEGYLS-----
EA\_Pyrfu4 : TKDTLEEDDEIANKREYAYRVSIVNSRSKGFVIVINNHETIYVYHDDIPLAVLYD-----PRTVEBVEVAVVAVVAVKEDQYVDYMAFDPEEMVTVELGYLAPYVGVPEGILN-----
EA\_Theko1 : TKETLHEDEEIANAKREHEHNRVLRNKKELGFTFTVYHDDIPLAVLYD-----ERAILBARFAAFVAVKLGDLVDFMAFDPEEMVTVELGYLAPYVGVPEGILN-----

Fig. S2f

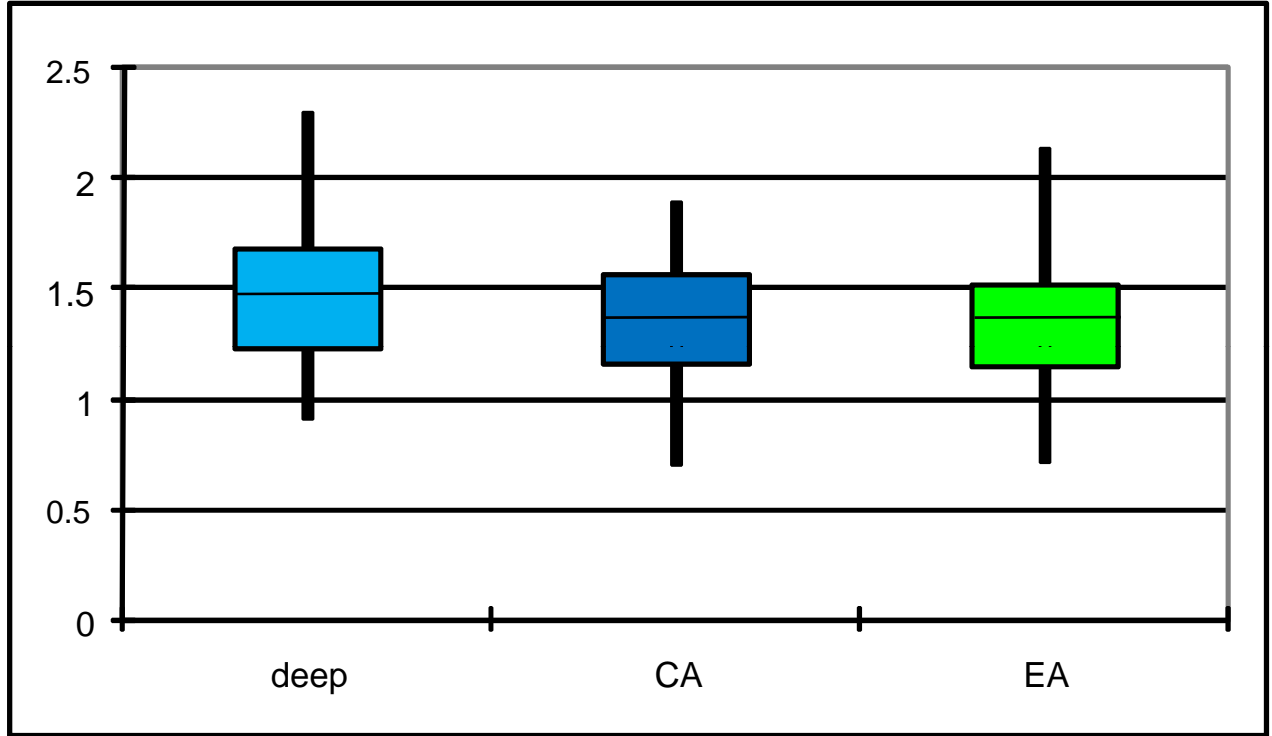

Fig. S3



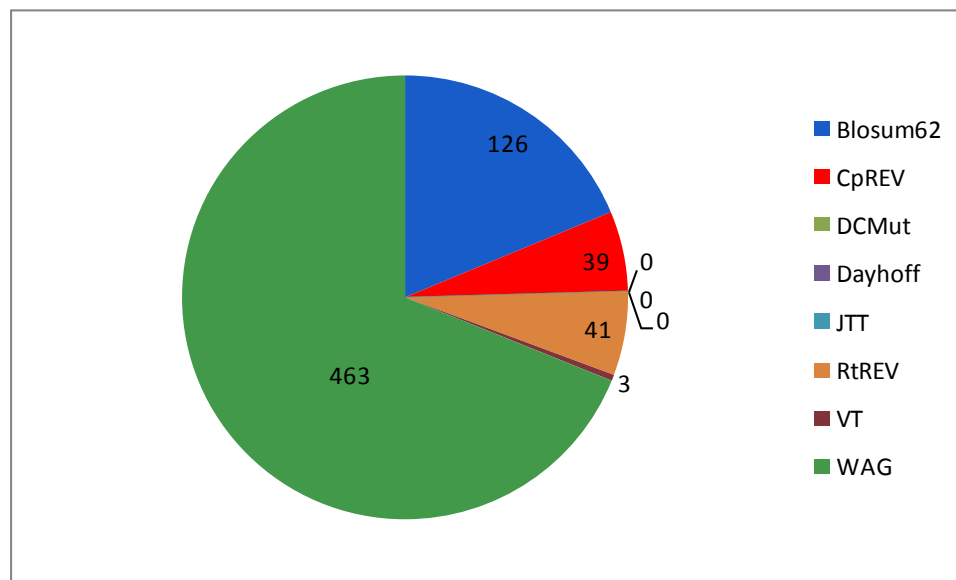

Fig. S4
